# Supplementary material for: Stereoselective Reformatskii–Claisen rearrangement: synthesis of 2′,3′-dideoxy-6′,6′-difluoro-2′-thionucleosides
Source: Royal Society of Chemistry journal article supplement (doi:10.1039/b819289h), 2009-01-01
Supplement: b819289h.pdf [file b819289h.pdf]

## Supporting Information

### Stereoselective Reformatskii-Claisen Rearrangement: Synthesis of 2',3'-Dideoxy-6',6'-difluoro-2'-thionucleosides

Feng Zheng , Xingang Zhang and Feng-ling Qing\* §,

§Key Laboratory of Organofluorine Chemistry, Shanghai Institute of Organic Chemistry, Chinese Academy of Science, 354 Fengling Lu, Shanghai 200032, China

\*Correspondence: [flq@mail.sioc.ac.cn](mailto:flq@mail.sioc.ac.cn)

|                                                                    |     |
|--------------------------------------------------------------------|-----|
| Preparation and characterization data for compound <b>7</b> .....  | S3  |
| Preparation and characterization data for compound <b>10</b> ..... | S4  |
| Preparation and characterization data for compound <b>11</b> ..... | S5  |
| Preparation and characterization data for compound <b>12</b> ..... | S6  |
| Preparation and characterization data for compound <b>13</b> ..... | S7  |
| Preparation and characterization data for compound <b>14</b> ..... | S8  |
| Preparation and characterization data for compound <b>15</b> ..... | S9  |
| Preparation and characterization data for compound <b>18</b> ..... | S9  |
| Preparation and characterization data for compound <b>20</b> ..... | S10 |
| Preparation and characterization data for compound <b>21</b> ..... | S11 |
| Preparation and characterization data for compound <b>22</b> ..... | S14 |
| Preparation and characterization data for compound <b>23</b> ..... | S15 |
| <sup>1</sup> H NMR spectrum of compound <b>7</b> .....             | S18 |
| Chiral HPLC analytical data of compound <b>7</b> .....             | S18 |
| <sup>1</sup> H NMR spectrum of compound <b>10</b> .....            | S19 |
| <sup>13</sup> C NMR spectrum of compound <b>10</b> .....           | S19 |
| Chiral HPLC analytical data of compound <b>10</b> .....            | S20 |
| <sup>1</sup> H NMR spectrum of compound <b>11</b> .....            | S21 |
| <sup>13</sup> C NMR spectrum of compound <b>11</b> .....           | S21 |
| <sup>1</sup> H NMR spectrum of compound <b>12</b> .....            | S22 |
| <sup>13</sup> C NMR spectrum of compound <b>12</b> .....           | S22 |
| <sup>1</sup> H NMR spectrum of compound <b>13</b> .....            | S23 |
| <sup>1</sup> H NMR spectrum of compound <b>14</b> .....            | S23 |
| <sup>13</sup> C NMR spectrum of compound <b>14</b> .....           | S24 |
| <sup>1</sup> H NMR spectrum of compound <b>15</b> .....            | S24 |
| <sup>13</sup> C NMR spectrum of compound <b>15</b> .....           | S25 |
| <sup>1</sup> H NMR spectrum of compound <b>18</b> .....            | S25 |
| <sup>13</sup> C NMR spectrum of compound <b>18</b> .....           | S26 |
| <sup>1</sup> H NMR spectrum of compound <b>20</b> .....            | S26 |
| <sup>13</sup> C NMR spectrum of compound <b>20</b> .....           | S27 |
| <sup>1</sup> H NMR spectrum of compound <b>21a</b> .....           | S27 |
| <sup>13</sup> C NMR spectrum of compound <b>21a</b> .....          | S28 |
| <sup>1</sup> H NMR spectrum of compound <b>21b</b> .....           | S28 |

---

|                                                                         |     |
|-------------------------------------------------------------------------|-----|
| <sup>13</sup> C NMR spectrum of compound <b>21b</b> .....               | S29 |
| <sup>1</sup> H NMR spectrum of compound <b>22a</b> .....                | S29 |
| <sup>13</sup> C NMR spectrum of compound <b>22a</b> .....               | S30 |
| <sup>1</sup> H NMR spectrum of compound <b>22b</b> .....                | S30 |
| <sup>13</sup> C NMR spectrum of compound <b>22b</b> .....               | S31 |
| <sup>1</sup> H NMR spectrum of compound <b>23a</b> .....                | S31 |
| <sup>13</sup> C NMR spectrum of compound <b>23a</b> .....               | S32 |
| NOESY NMR spectrum of compound <b>23a</b> .....                         | S32 |
| X-ray crystal structure of compound <b>23a</b> .....                    | S33 |
| <sup>1</sup> H NMR spectrum of compound <b>23b</b> .....                | S33 |
| <sup>13</sup> C NMR spectrum of compound <b>23b</b> .....               | S34 |
| Chiral HPLC analytical data of compound <b>21a</b> .....                | S35 |
| Chiral HPLC analytical data of compound <b>21b</b> and <b>23b</b> ..... | S36 |

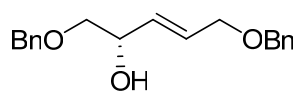

(2*S*, *E*)-1,5-Bis(benzyloxy)pent-3-en-2-ol (**7**)

To a suspension of NaH (60% in oil, 1.79 g, 44.75 mmol) and Bu<sub>4</sub>NI (1.65 g, 4.47 mmol) in anhydrous THF (200 mL) was added a solution of compound **6** (12.41 g, 59.66 mmol) in anhydrous THF (70 mL) slowly at 0 °C. After the mixture was stirred for 20 min at the same temperature, it was allowed to warm to room temperature and stirred for 60 min. Then the resulting reaction mixture was cooled to 0 °C, treated with BnBr (5.3 mL, 44.72 mmol) in anhydrous THF (90 mL) and stirred at room temperature. Water was added when the side product (2*S*,*E*)-1,2,5-tri-*O*-benzyl-3-penten-1,2,3-triol appeared. The aqueous layer was extracted with ether. The combined organic layers were washed with brine, dried over anhydrous Na<sub>2</sub>SO<sub>4</sub>, filtered, and the solvent was removed in vacuo. The residue was purified by silica gel column chromatography (petroleum ether: ethyl acetate = 5 : 1) to give compound **7** (10.4 g, 59% yield) as a clear oil and 4.78g of recovered compound **6**. The recovered compound **6** repeated the reaction procedure as above and afforded another 3.95g of compound **7** (22% yield). The overall yield of the reaction was 81%. :  $[\alpha]_D^{26} = +22.0^\circ$  (*c* 1.50, CHCl<sub>3</sub>); <sup>1</sup>H NMR (300 MHz, CDCl<sub>3</sub>) δ 7.36-7.25 (m, 10H), 5.98-5.89 (m, 1H), 5.80-5.65 (m, 1H), 4.70-4.41 (m, 4H), 4.43-3.97 (m, 1H), 3.63-3.36 (m, 2H), 2.29 (s, 1H); IR (KBr)  $\nu_{\max}$  3440, 3029, 2856, 1496, 1071, 696 cm<sup>-1</sup>; MS (ESI) *m/z* 321.2 (M<sup>+</sup>+Na); Anal. Calcd for C<sub>19</sub>H<sub>22</sub>O<sub>3</sub>: C, 76.48; H, 7.43 Found: C, 76.16; H, 7.51. The chiral HPLC analytical data: Chiralpak IC column, detected at λ=220nm, eluent: n-hexane/*i*-PrOH (80:20), 0.7ml/ min, *t*<sub>R</sub> (minor)=12.6 min, *t*<sub>R</sub> (major)=13.3 min, 99% *ee*.

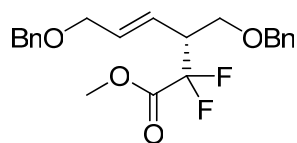

**(*R,E*)-methyl 6-(benzyloxy)-3-(benzyloxymethyl)-2,2-**

**difluorohex-4-enoate (10)** To a solution of chlorodifluoroacetic acid (7.36 g, 56.39 mmol) and oxalyl chloride (7.16 g, 56.38 mmol) in anhydrous  $\text{CH}_2\text{Cl}_2$  (70 mL) were added catalytic DMF at 0 °C. After the reaction mixture was stirred for 60 min at room temperature, the reaction mixture was cooled to –5 °C, and a mixture of compound **7** (5.60 g, 18.79 mmol),  $\text{NEt}_3$  (13 mL, 92.52 mmol) in anhydrous  $\text{CH}_2\text{Cl}_2$  (50 mL) was added dropwise. The reaction mixture was warmed to ambient temperature and was stirred for 1 h. Then the reaction was quenched with water. The resultant mixture was extracted with  $\text{Et}_2\text{O}$ . The combined organic layer was washed with water and brine. After the resultant solution was dried over anhydrous  $\text{Na}_2\text{SO}_4$  and filtered, the solvent was removed in *vacuo*. Flash chromatography (petroleum ether: ethyl acetate = 10:1) afforded the crude product **8** (7.61 g, 18.51 mmol) as a clear yellow oil . Then a mixture of **8** (7.61 g, 18.51 mmol), chlorotrimethyl silane (4.7 mL, 37.08 mmol), dry pyridine (3.0 mL, 37.11 mmol) and freshly activated zinc dust (12.03 g, 185.07 mmol) in dry acetonitrile (70 mL) was heated to 120 °C over a period of 20 min and stirred for 5 h at the same temperature. After the reaction mixture cooled to room temperature, the mixture was filtered and the residue was washed by MeOH (20 mL  $\times$  2). To the combined organic solution,  $\text{SOCl}_2$  (5 mL) was added slowly and then stirred for 1 h. Water was added to quench the reaction and the solvent was partially removed in *vacuo*. The resultant mixture was extracted with  $\text{Et}_2\text{O}$ . The combined organic layer was washed with brine, and dried over anhydrous

Na<sub>2</sub>SO<sub>4</sub>, filtered, and concentrated. The residue was purified by silica gel chromatography (petroleum ether: ethyl ether = 40:1) to give compound **10** (3.06 g, 41% yield for three steps, *ee* 90%) as a clear oil:  $[\alpha]_D^{26} = -15.7^\circ$  (*c* 2.00, CHCl<sub>3</sub>); <sup>1</sup>H NMR (300 MHz, CDCl<sub>3</sub>)  $\delta$  7.37-7.26 (m, 10H), 5.87 (dt, *J* = 15.6, 5.7 Hz, 1H), 5.65 (dd, *J* = 15.6, 9.0 Hz, 1H), 4.50 (s, 2H), 4.44 (s, 1H), 4.03 (d, *J* = 5.7 Hz, 2H), 3.64 (s, 3H), 3.69-3.54 (m, 2H), 3.40-3.22 (m, 1H); <sup>13</sup>C NMR (100.7 MHz, CDCl<sub>3</sub>)  $\delta$  164.3, 138.1, 137.5, 133.8, 131.2, 128.4 (d, *J* = 4.0 Hz), 127.8 (d, *J* = 4.3 Hz), 127.7, 123.8 (t, *J* = 3.4 Hz), 115.4 (dd, *J* = 255.9, 251.1 Hz), 73.5, 72.1, 70.0, 68.1 (dd, *J* = 5.3, 3.1 Hz), 53.0, 47.6 (t, *J* = 22.2 Hz); <sup>19</sup>F NMR (282 MHz, CDCl<sub>3</sub>)  $\delta$  -107.4 (dd, *J* = 257.7, 9.0 Hz, 1F), -116.2 (dd, *J* = 257.7, 20.3 Hz, 1F); IR (KBr)  $\nu_{\max}$  3031, 2858, 1766, 1496, 1454, 1362, 1095, 697 cm<sup>-1</sup>; MS (ESI) *m/z* 408.3 (M<sup>+</sup>+NH<sub>4</sub>), 413.2 (M<sup>+</sup>+Na); HRMS Calcd for C<sub>22</sub>H<sub>24</sub>O<sub>4</sub>F<sub>2</sub>Na<sup>+</sup> (M<sup>+</sup> + Na): 413.1536. Found: 413.1535. The chiral HPLC analytical data: Chiralpak IC column, detected at  $\lambda$ =214nm, eluent: *n*-hexane/*i*-PrOH (95:5), 0.4ml/min, *t*<sub>R</sub> (major) =18.0 min, *t*<sub>R</sub> (minor)=19.3 min, 90% *ee*.

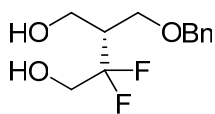

**(R)-3-(benzyloxymethyl)-2,2-difluorobutane-1,4-diol (11)** A

solution of compound **10** (1.89 g, 4.85 mmol) in CH<sub>2</sub>Cl<sub>2</sub> (50 mL) was ozonized at -78 °C for 30 min. Then a suspension of NaBH<sub>4</sub> (850 mg, 22.36 mmol) in C<sub>2</sub>H<sub>5</sub>OH (15 mL) was added to the reaction mixture. The reaction mixture was warmed to room temperature and was stirred for 30 min. Then the reaction was quenched with water. The resultant mixture was extracted with EtOAc. The combined organic layers were

washed with brine, dried over anhydrous Na<sub>2</sub>SO<sub>4</sub>, filtered, and the solvent was removed in vacuo. The residue was purified by silica gel column chromatography (petroleum ether: ethyl acetate = 3 : 1) to give compound **11** (1.09 g, 92 % yield) as a clear oil:  $[\alpha]_D^{27} = -1.9^\circ$  (*c* 1.10, CHCl<sub>3</sub>); <sup>1</sup>H NMR (300 MHz, CDCl<sub>3</sub>),  $\delta$  7.39-7.29 (m, 5H), 4.53 (s, 2H), 3.93-3.82 (m, 2H), 3.81-3.45 (m, 4H), 3.03 (s, 2H), 2.57-2.40 (m, 1H); <sup>13</sup>C NMR (75.5 MHz, CDCl<sub>3</sub>)  $\delta$  137.2, 128.7, 128.2, 127.9, 123.2 (t, *J* = 246.3 Hz), 73.8, 66.7 (t, *J* = 5.7 Hz), 63.5 (t, *J* = 33.2 Hz), 59.3 (t, *J* = 5.8 Hz), 46.1 (t, *J* = 22.5 Hz); <sup>19</sup>F NMR (282 MHz, CDCl<sub>3</sub>)  $\delta$  -108.4 (ddd, *J* = 257.7, 27.1, 14.4 Hz, 1F), -109.4 (ddd, *J* = 257.2, 27.1, 15.2 Hz, 1F); IR (KBr)  $\nu_{\max}$  3391, 2879, 1454, 1367, 1072, 906, 698 cm<sup>-1</sup>; MS (ESI) *m/z* 269.0 (M<sup>+</sup>+Na); HRMS Calcd for C<sub>12</sub>H<sub>16</sub>O<sub>3</sub>F<sub>2</sub>Na<sup>+</sup> (M<sup>+</sup>+ Na): 269.0960. Found: 269.0959.

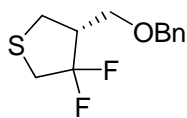

**(R)-4-Benzyloxymethyl-3,3-difluoro-tetrahydrothiophene (12).**

To a compound **11** (1.07 g, 4.35 mmol) in anhydrous CH<sub>2</sub>Cl<sub>2</sub> (15 mL), and pyridine (5 mL) was added MsCl (1.35 mL, 17.45 mmol) slowly at 0 °C. The reaction mixture was then warmed to room temperature and stirred overnight. The reaction was quenched with water. The resulting mixture was extracted with ethyl acetate. The combined organic layers were washed with 1N HCl, saturated NaHCO<sub>3</sub> solution, water and brine, dried over anhydrous Na<sub>2</sub>SO<sub>4</sub>, filtered, and the solvent was removed in vacuo. The residue was dissolved in DMF (40 mL) and Na<sub>2</sub>S·9H<sub>2</sub>O (2.01 g, 8.38 mmol) was added. Then the reaction mixture was heated to 90 °C. After stirring for 30 min, the reaction mixture was cooled to room temperature and water was added. The

resulting mixture was extracted with ether. The combined organic layers were washed with water and brine, dried over anhydrous Na<sub>2</sub>SO<sub>4</sub>, filtered, and the solvent was removed in vacuo. The residue was purified by silica gel column chromatography (petroleum ether: ethyl acetate = 40 : 1) to give compound **12** (851 mg, 81 % yield for two steps) as a light yellow oil:  $[\alpha]_D^{27} = +20.0^\circ$  (*c* 1.20, CHCl<sub>3</sub>) <sup>1</sup>H NMR (300 MHz, CDCl<sub>3</sub>)  $\delta$  7.38-7.26 (m, 5H), 4.53 (dd, *J* = 14.1, 12.0 Hz, 2H) 3.74 (dd, *J* = 9.3, 4.2 Hz, 1H), 3.54 (t, *J* = 8.7 Hz, 2H), 3.27-3.06 (m, 3H), 2.91-2.71 (m, 2H); <sup>13</sup>C NMR (75.5 MHz, CDCl<sub>3</sub>)  $\delta$  137.9, 130.0 (t, *J* = 252.6 Hz), 128.6, 127.9, 127.7, 73.5, 67.1 (d, *J* = 5.7 Hz), 48.2 (t, *J* = 22.0 Hz), 36.3 (t, *J* = 27.8 Hz), 30.1 (d, *J* = 4.8 Hz); <sup>19</sup>F NMR (282 MHz, CDCl<sub>3</sub>)  $\delta$  -100.1 (ddd, *J* = 231.2, 21.4, 9.6 Hz, 1F), -108.6 (ddd, *J* = 230.4, 33.3, 18.1 Hz, 1F); IR (KBr)  $\nu_{\max}$  3030, 2866, 1454, 1100, 1028, 697 cm<sup>-1</sup>; MS (ESI) *m/z* 245.0 (M<sup>+</sup>+H), 266.9 (M<sup>+</sup>+Na); HRMS Calcd for C<sub>12</sub>H<sub>14</sub>OF<sub>2</sub>S<sup>+</sup> (M<sup>+</sup>): 244.0733. Found: 244.0739.

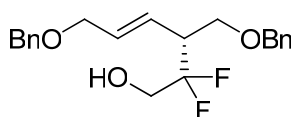

**(*R,E*)-6-Benzyloxy-3-benzyloxymethyl-2,2-difluorohex-**

**4-en-1-ol (13)** Compound **10** (2.12 g, 5.43 mmol) was dissolved in CH<sub>3</sub>OH (15 mL) and then NaBH<sub>4</sub> (310 mg, 8.16 mmol) was added at 0 °C. The reaction mixture was then warmed to room temperature and stirred for 30 min. Then the reaction was quenched with water. The resultant mixture was extracted with EtOAc. The combined organic layers were washed with brine, dried over anhydrous Na<sub>2</sub>SO<sub>4</sub>, filtered, and the solvent was removed in vacuo. The residue was purified by silica gel column chromatography (petroleum ether: ethyl acetate = 3 : 1) to give compound **13** (1.85 g,

94 % yield) as a clear oil:  $[\alpha]_D^{27} = -14.8^\circ$  ( $c$  0.48,  $\text{CHCl}_3$ );  $^1\text{H}$  NMR (300 MHz,  $\text{CDCl}_3$ )  $\delta$  7.38-7.29 (m, 10H), 5.85 (dt,  $J = 15.9, 5.7$  Hz, 1H), 5.70 (dd,  $J = 15.9, 8.4$  Hz, 1H), 4.54 (s, 2H), 4.51 (s, 2H), 4.03 (d,  $J = 5.4$  Hz, 2H), 3.88-3.58 (m, 4H), 3.15-2.98 (m, 1H), 2.36 (br, 1H);  $^{19}\text{F}$  NMR (282 MHz,  $\text{CDCl}_3$ )  $\delta$  -106.6 (dm,  $J = 253.0$  Hz, 1F), -114.4 (dm,  $J = 253.2$  Hz, 1F); IR (KBr)  $\nu_{\text{max}}$  3430, 2925, 1453, 1261, 1074, 698  $\text{cm}^{-1}$ ; MS (ESI)  $m/z$  385.2 ( $\text{M}^+ + \text{Na}$ ), 380.3 ( $\text{M}^+ + \text{NH}_4$ ); Anal. Calcd for  $\text{C}_{21}\text{H}_{24}\text{O}_3\text{F}_2$ : C, 69.60; H, 6.67. Found: C, 69.10; H, 6.70.

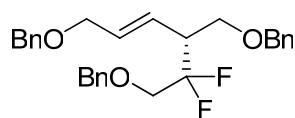

**(*R,E*)-1,6-*O*-Dibenzyl-3-benzyloxymethyl-2,2-difluoro-4-hexen-1,6-diol (**14**)**

To a suspension of NaH (60% in oil, 258 mg, 6.45 mmol) and  $\text{Bu}_4\text{NI}$  (236 mg, 0.64 mmol) in anhydrous THF (40 mL) was added a solution of compound **13** (1.78 g, 4.92 mmol) in anhydrous THF (10 mL) slowly at 0  $^\circ\text{C}$ . After the mixture was stirred for 20 min at the same temperature, it was allowed to warm to room temperature and stirred for 20 min. Then the resulting reaction mixture was cooled to 0  $^\circ\text{C}$ , treated with BnBr (0.9 mL, 7.49 mmol) in anhydrous THF (10 mL) and stirred at room temperature for 3 h. Then water was added to quench the reaction and the resulting mixture was extracted with  $\text{Et}_2\text{O}$ . The combined organic layer was washed with water and brine. Then, the resultant organic phase was dried over anhydrous  $\text{Na}_2\text{SO}_4$  and filtered, the solvent was removed in *vacuo*. The residue was purified by silica gel column chromatography (petroleum ether: ethyl acetate = 10: 1) to give compound **14** (2.05 g, 91%) as a clear oil:  $[\alpha]_D^{27} = -3.4^\circ$  ( $c$  0.40,  $\text{CHCl}_3$ );  $^1\text{H}$  NMR (300 MHz,  $\text{CDCl}_3$ )  $\delta$  7.32-7.28 (m, 15H), 5.83 (dt,  $J = 15.9, 5.7$  Hz, 1H), 5.67

(dd,  $J = 15.9, 8.7$  Hz, 1H), 4.56 (dd,  $J = 15.6, 12.0$  Hz, 2H), 4.50-4.44 (m, 4H), 4.01 (d,  $J = 5.4$  Hz, 2H), 3.78- 3.57 (m, 4H), 3.23-3.06 (m, 1H);  $^{13}\text{C}$  NMR (100.7 MHz,  $\text{CDCl}_3$ )  $\delta$  138.2, 137.9, 137.2, 132.4, 128.4, 128.3, 127.9, 127.8, 127.7, 127.6, 126.9, 122.4 (t,  $J = 247.3$  Hz), 73.8, 73.3, 71.9, 69.9, 67.9 (t,  $J = 4.5$  Hz), 66.9, 46.7 (t,  $J = 22.6$  Hz);  $^{19}\text{F}$  NMR (282 MHz,  $\text{CDCl}_3$ )  $\delta$  -108.9 (ddd,  $J = 255.4, 25.9, 14.4$  Hz, 1F), -109.7 (ddd,  $J = 257.4, 26.8, 13.0$  Hz, 1F); IR (KBr)  $\nu_{\text{max}}$  3031, 2864, 1454, 1106, 1028, 698  $\text{cm}^{-1}$ ; MS (ESI)  $m/z$  470.4 ( $\text{M}^+ + \text{NH}_4$ ), 475.3 ( $\text{M}^+ + \text{Na}$ ); HRMS Calcd for  $\text{C}_{28}\text{H}_{30}\text{O}_3\text{F}_2\text{Na}^+$  ( $\text{M}^+ + \text{Na}$ ): 475.2047. Found: 475.2055.

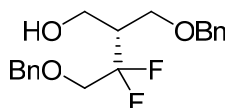

**(R)-4-Benzyloxy-2-benzyloxymethyl-3,3-difluorobutan-1-ol**

**(15)** Compound **15** (1.39 g, 92%) was prepared from compound **14** (2.05 g, 4.53 mmol) using the same conditions as described for compound **11**. Clear oil:  $[\alpha]_{\text{D}}^{27} = +5.9^\circ$  ( $c$  0.89,  $\text{CHCl}_3$ );  $^1\text{H}$  NMR (300 MHz,  $\text{CDCl}_3$ )  $\delta$  7.38-7.25 (m, 10 H), 4.59 (s, 2H), 4.51 (s, 2H), 3.90 (d,  $J = 5.1$  Hz, 2H), 3.80-3.62 (m, 4H), 2.66-2.49 (m, 1H), 2.21 (br, 1H);  $^{13}\text{C}$  NMR (75.5 MHz,  $\text{CDCl}_3$ )  $\delta$  137.7, 137.0, 128.7, 128.6, 128.3, 128.0, 127.8, 127.1, 122.9 (t,  $J = 245.5$  Hz), 74.1, 73.6, 69.9 (t,  $J = 31.9$  Hz), 67.2 (t,  $J = 5.5$  Hz), 60.1 (t,  $J = 5.4$  Hz), 45.9 (t,  $J = 20.7$  Hz);  $^{19}\text{F}$  NMR (282 MHz,  $\text{CDCl}_3$ )  $\delta$  -106.2 (ddd,  $J = 261.1, 26.2, 13.8$  Hz, 1F), -106.7 (ddd,  $J = 261.4, 27.6, 17.6$  Hz, 1F); IR (KBr)  $\nu_{\text{max}}$  3448, 3032, 2873, 1453, 1273, 1105, 697  $\text{cm}^{-1}$ ; MS (ESI)  $m/z$  359.1 ( $\text{M}^+ + \text{Na}$ ), HRMS Calcd for  $\text{C}_{19}\text{H}_{22}\text{O}_3\text{F}_2\text{Na}^+$  ( $\text{M}^+ + \text{Na}$ ): 359.1427; Found: 359.1429.

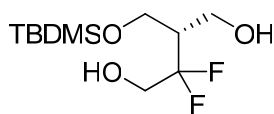

**(S)-3-(tert-Butyldimethylsilyloxy)methyl-2,2-difluorobutane-1,4-diol (18)** To a solution of compound **15** (1.38 g, 4.11 mmol) and

imidazole (558 mg, 8.21 mmol) in DMF (8 mL) was added TBDMSCl (1.12 g, 7.44 mmol) at 0 °C . The reaction mixture was then warmed to room temperature and stirred overnight. The reaction was quenched with water. The resulting mixture was extracted with Et<sub>2</sub>O. The combined organic layers were washed with water and brine, dried over anhydrous Na<sub>2</sub>SO<sub>4</sub>, filtered, and the solvent was removed in vacuo. The residue was purified by silica gel column chromatography (petroleum ether: ethyl acetate = 40: 1) to give compound **17** (1.63 g, 88%). Then a mixture of compound **17** (1.63 g, 3.62 mmol) and 10% palladium/carbon (320 mg ) in ethanol (160 mL) was hydrogenated at room temperature and atmospheric pressure for 20 h. The mixture was filtered, and the filtrate evaporated at reduced pressure. The residue was purified by silica gel column chromatography (petroleum ether: ethyl acetate = 3: 1) to give compound **18** (818 mg, 84% yield) as a clear oil:  $[\alpha]_D^{28} = -0.91^\circ$  (*c* 0.69, CHCl<sub>3</sub>); <sup>1</sup>H NMR (300 MHz, CDCl<sub>3</sub>) δ 3.86-3.61 (m, 6H), 2.72 (br, 2H), 2.33-2.16 (m, 1H), 0.80 (s, 9H), 0.00 (s, 6H); <sup>13</sup>C NMR (100.7 MHz, CDCl<sub>3</sub>) δ 123.2 (t, *J*=246.3 Hz), 63.6 (t, *J*=32.5 Hz), 60.1 (t, *J*=5.6 Hz), 59.4 (t, *J*=5.2 Hz), 48.0 (t, *J*=21.7 Hz), 25.8, 18.1, -5.7; <sup>19</sup>F NMR (282 MHz, CDCl<sub>3</sub>) δ -108.3 (ddd, *J*=258.3, 28.2, 12.4 Hz, 1F), -110.3 (ddd, *J*= 257.5, 28.2, 15.2 Hz, 1F); IR (KBr )  $\nu_{\max}$  3366, 2955, 2859, 1472, 1257, 1079, 837, 778 cm<sup>-1</sup>; MS (ESI) *m/z* 271.2 (M<sup>+</sup>+H), 293.2 (M<sup>+</sup>+Na), HRMS Calcd for C<sub>11</sub>H<sub>25</sub>O<sub>3</sub>F<sub>2</sub>Si<sup>+</sup> (M<sup>+</sup> +H): 271.1541. Found: 271.1536.

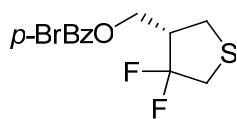

**(S)-(4,4-difluorotetrahydrothiophen-3-yl)methyl**

**4-bromobenzoate (20)** The compound **19** (643 mg, 81%) was prepared from

compound **18** (801 mg, 2.97 mmol) using the same condition as described for the compound **12**. Then, to a solution of compound **19** (643 mg, 2.40 mmol) in dry THF (15 mL) was added a solution of TABF (1M in THF, 2.5 mL) and stirred for 2 h. The solvent was evaporated at reduced pressure. The crude product was dissolved in dry CH<sub>2</sub>Cl<sub>2</sub> (12 mL) and pyridine (5 mL), and *p*-BrBzCl (1.05 g, 4.78 mmol) was added at 0 °C. The reaction mixture was warmed to room temperature and stirred for 1 h. The reaction was quenched with water. The resulting mixture was extracted with CH<sub>2</sub>Cl<sub>2</sub>. The combined organic layers were washed with 1N HCl, saturated NaHCO<sub>3</sub> solution, water and brine, dried over anhydrous Na<sub>2</sub>SO<sub>4</sub>. The solvent was removed in *vacuo*. The residue was purified by silica gel column chromatography (petroleum ether: ethyl acetate = 40: 1) to give compound **20** (668 mg, 83 %) as a clear oil:  $[\alpha]_D^{27} = -13.9^\circ$  (*c* 0.18, CHCl<sub>3</sub>); <sup>1</sup>H NMR (300 MHz, CDCl<sub>3</sub>) δ 7.90 (d, *J* = 8.7 Hz, 2H), 7.59 (d, *J* = 8.7 Hz, 2H), 4.58 (dd, *J* = 11.4, 5.4 Hz, 1H), 4.44 (dd, *J* = 11.4, 6.6 Hz, 2H), 3.36-2.89 (m, 5H); <sup>13</sup>C NMR (100.7 MHz, CDCl<sub>3</sub>) δ 165.4, 131.8, 131.1, 129.5 (t, *J* = 255.5 Hz), 128.5 (d, *J* = 4.5 Hz), 61.6, 47.0 (t, *J* = 22.5 Hz), 36.1 (t, *J* = 29.2 Hz), 29.1 (dd, *J* = 5.9, 1.5 Hz); <sup>19</sup>F NMR (282 MHz, CDCl<sub>3</sub>) δ -100.6 (ddd, *J* = 233.2, 18.8, 8.7 Hz, 1F), -108.3 (ddd, *J* = 233.2, 32.7, 17.8 Hz, 1F); IR (KBr)  $\nu_{\max}$  2926, 1725, 1591, 1269, 1116, 1012, 756 cm<sup>-1</sup>; MS (EI) *m/z* 136 (M<sup>+</sup>-C<sub>7</sub>H<sub>5</sub>O<sub>2</sub>Br), HRMS Calcd for C<sub>5</sub>H<sub>7</sub>F<sub>2</sub>S<sup>+</sup>: 137.0237. Found: 137.0231, HRMS Calcd for C<sub>7</sub>H<sub>4</sub>OBr<sup>+</sup>: 182.9446. Found: 182.9449.

**1-((2*S*,4*R*)-3,3-Difluoro-4-(hydroxymethyl)-tetrahydrothiophen-2-yl)-5-fluorouracil (21a) and 1-((2*R*,4*R*)-3,3-Difluoro-4-(hydroxymethyl)-tetrahydro**

**thiophen-2-yl)-5-fluorouracil (21b).** A solution of *m*-CPBA (80%, 154 mg, 0.71 mmol) in CH<sub>2</sub>Cl<sub>2</sub> (5 mL) was added dropwise to the solution of compound **12** (174 mg, 0.71 mmol) in CH<sub>2</sub>Cl<sub>2</sub> (8 mL) at –70 °C. The reaction mixture was stirred at –70 °C for 40 min. Then the mixture was quenched with saturated NaHCO<sub>3</sub> solution, the resulting mixture was extracted with CH<sub>2</sub>Cl<sub>2</sub>. The combined organic layers were washed with 10% of aqueous Na<sub>2</sub>SO<sub>3</sub> and brine, dried over anhydrous Na<sub>2</sub>SO<sub>4</sub>, filtered, and the solvent was removed in vacuo to give the sulfoxide, which was used directly in next step without purification. To a solution of silylated 5-fluorouracil, prepared from refluxing 5-fluorouracil (278 mg, 2.14 mmol) and ammonium sulfate (catalytic amount) in HMDS (6 mL), in anhydrous DCE (2 mL) was added a solution of the sulfoxide in anhydrous DCE (6 mL) followed by addition of TMSOTf (258 µL, 1.42 mmol) at 0 °C, and the mixture was stirred at the same temperature for 30 min. The mixture was quenched with saturated aqueous NaHCO<sub>3</sub> solution, filtered and poured into CH<sub>2</sub>Cl<sub>2</sub>. The organic layers were washed with brine, dried over anhydrous Na<sub>2</sub>SO<sub>4</sub>, filtered, and the solvent was removed in vacuo. The residue was purified by silica gel column chromatography (petroleum ether: ethyl acetate = 3 : 1) to give  $\alpha$  isomer of protected 5-fluorouridine (69 mg) and  $\beta$  isomer of protected 5-fluorouridine (43 mg). To a solution of  $\alpha$  isomer (69 mg, 0.18 mmol) in anhydrous CH<sub>2</sub>Cl<sub>2</sub> (10 mL) was added BCl<sub>3</sub> (1M in CH<sub>2</sub>Cl<sub>2</sub>, 3.7 mL, 3.7 mmol) at –70 °C. After the reaction mixture was stirred for 2h, the mixture was quenched with MeOH (5 mL), and the solvent was removed in vacuo. The residue was purified by silica gel column

chromatography (CH<sub>2</sub>Cl<sub>2</sub>: MeOH = 20: 1) to give compound **21a** (41mg, 20 % yield for three steps) as a white solid.

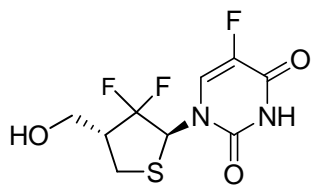

Compound **21a**: m. p. 193-195 °C;  $[\alpha]_D^{27} = +22.1^\circ$  (*c* 1.00 MeOH); <sup>1</sup>H NMR (300 MHz, MeOH-d<sub>4</sub>) δ 8.22 (d, *J* = 6.3 Hz, 1H), 6.28 (dd, *J* = 12.0, 3.6 Hz, 1H), 3.83 (dd, *J* = 11.1, 5.1 Hz, 1H), 3.69 (dd, *J* = 11.7, 7.8 Hz, 1H), 3.37 (dd, *J* = 10.5, 7.8 Hz, 1H), 2.85 (t, *J* = 10.5 Hz, 1H), 2.79-2.62 (m, 1H); <sup>13</sup>C NMR (100.7 MHz, MeOH-d<sub>4</sub>) δ 157.6 (d, *J* = 26.4 Hz), 149.8, 140.1 (d, *J* = 235.0 Hz), 127.4 (t, *J* = 257.5 Hz), 125.3 (d, *J* = 35.8 Hz), 63.1 (dd, *J* = 39.5, 21.3 Hz), 57.9 (d, *J* = 4.9 Hz), 27.4 (d, *J* = 6.9 Hz); <sup>19</sup>F NMR (282 MHz, MeOH-d<sub>4</sub>) δ -110.3 (ddd, *J* = 236.9, 8.7, 3.9 Hz, 1F), -112.9 (ddd, *J* = 236.3, 20.6, 11.2 Hz, 1F), -166.5 (d, *J* = 7.9 Hz, 1F); IR (KBr)  $\nu_{\max}$  3462, 3020, 1723, 1690, 1387, 1099 cm<sup>-1</sup>; MS *m/z* 587.0 (2M<sup>+</sup>+Na); HRMS Calcd for C<sub>9</sub>H<sub>9</sub>O<sub>3</sub>N<sub>2</sub>F<sub>3</sub>SNa (M<sup>+</sup>+ Na): 305.0190. Found: 305.0178.

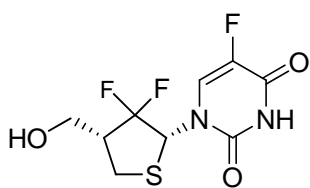

Compound **21b** (27 mg, 14 % yield for three steps) was prepared from the β isomer of protected 5-fluorouridine using the same conditions as for compound **21a**. white solid: m. p. 200-202 °C;  $[\alpha]_D^{27} = +14.3^\circ$  (*c* 0.51 MeOH); <sup>1</sup>H NMR (300 MHz, MeOH-d<sub>4</sub>) δ 8.11 (dd, *J* = 6.9, 3.0 Hz, 1H), 6.61 (dd, *J* = 15.0, 8.4 Hz, 1H), 3.88 (dd, *J* = 11.1, 5.1 Hz, 1H), 3.67 (dd, *J* = 11.1, 7.5 Hz, 1H), 3.25-3.10 (m, 2H), 3.05-2.86 (m, 1H); <sup>13</sup>C NMR (100.7 MHz, MeOH-d<sub>4</sub>) δ 157.6 (d, *J* = 26.2 Hz), 149.8, 139.8 (d, *J* = 234.6 Hz), 126.41 (t, *J* = 258.1 Hz), 126.42 (dd, *J* = 35.9,

4.5 Hz), 61.9 (dd,  $J=29.2, 19.5$  Hz), 57.9 (d,  $J=5.9$  Hz), 49.0 (t,  $J=21.8$  Hz), 28.9 (d,  $J=8.3$  Hz);  $^{19}\text{F}$  NMR (282 MHz, MeOH- $\text{d}_4$ )  $\delta$  -109.6 (dt  $J=230.4, 6.2$  Hz, 1F), -121.8 (dm,  $J=230.9$  Hz, 1F), -167.2 (d,  $J=6.8$  Hz, 1F); IR (KBr)  $\text{max}$  3461, 3051, 1701, 1664, 1389, 1225  $\text{cm}^{-1}$ ; MS  $m/z$  283.1 ( $\text{M}^+ + \text{H}$ ); HRMS Calcd for  $\text{C}_9\text{H}_9\text{O}_3\text{N}_2\text{F}_3\text{SNa}$  ( $\text{M}^+ + \text{Na}$ ): 305.0179. Found: 305.0178.

**1-((2*S*,4*R*)-3,3-Difluoro-4-(hydroxymethyl)-tetrahydrothiophen-2-yl)thymine (22a) and 1-((2*R*,4*R*)-3,3-Difluoro-4-(hydroxymethyl)-tetrahydrothiophen-2-yl)thymine (22b)** Conversion of **12** (181 mg, 0.74 mmol) to **22** was accomplished using the same procedure as described above. Compound **22a** (29 mg, 16% yield for three steps) was obtained as a white solid and compound **22b** (16 mg, 9% yield for three steps) was obtained as a white solid too.

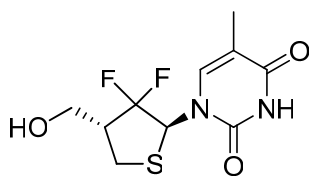

Compound **22a**: m. p. 186-188 °C;  $[\alpha]_{\text{D}}^{27} = +33.9^\circ$  ( $c$  0.70, MeOH);  $^1\text{H}$  NMR (300 MHz, MeOH- $\text{d}_4$ )  $\delta$  7.84 (s, 1H), 6.34 (dd,  $J=12.3, 4.5$  Hz, 1H), 3.87 (dd,  $J=11.1, 4.8$  Hz, 1H), 3.73 (dd,  $J=11.4, 7.2$  Hz, 1H), 3.40 (dd,  $J=18.3, 10.2$  Hz, 1H), 2.89 (t,  $J=10.5$  Hz, 1H), 2.83-2.66 (m, 1H), 1.93 (s, 3H);  $^{13}\text{C}$  NMR (100.7 MHz, MeOH- $\text{d}_4$ )  $\delta$  164.6, 151.4, 136.8, 127.6 (t,  $J=256.4$  Hz), 110.7, 62.5 (dd,  $J=39.0, 21.1$  Hz), 58.1 (d,  $J=5.2$  Hz), 27.5 (d,  $J=6.1$  Hz), 11.0;  $^{19}\text{F}$  NMR (282 MHz, MeOH- $\text{d}_4$ )  $\delta$  -107.3 (ddd,  $J=236.9, 8.4, 3.9$  Hz, 1F), -109.6 (ddd,  $J=236.9, 20.3, 12.9$  Hz, 1F); IR (KBr)  $\text{max}$  3414, 3045, 1693, 1466, 1377, 1220  $\text{cm}^{-1}$ ; MS

$m/z$  301.0 ( $M^+ + Na$ ); HRMS Calcd for  $C_{10}H_{13}O_3N_2F_2S^+$  ( $M^+ + H$ ): 279.0609. Found: 279.0609.

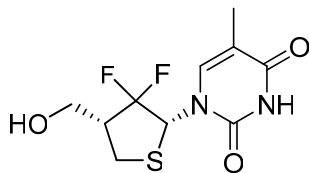

Compound **22b**: m. p. 204-205 °C;  $[\alpha]_D^{27} = +2.8^\circ$  ( $c$  0.41, MeOH);  $^1H$  NMR (300 MHz, MeOH- $d_4$ )  $\delta$  7.70 (d,  $J = 2.7$  Hz, 1H), 6.59 (dd,  $J = 15.3, 8.4$  Hz, 1H), 3.84 (dd,  $J = 11.1, 5.4$  Hz, 1H), 3.63 (dd,  $J = 11.4, 7.5$  Hz, 1H), 3.21-3.08 (m, 2H), 2.99-2.81 (m, 1H), 1.87 (s, 3H);  $^{13}C$  NMR (100.7 MHz, MeOH- $d_4$ )  $\delta$  166.3, 153.1, 139.8 (d,  $J = 5.2$  Hz), 128.1 (dd,  $J = 263.1, 254.9$  Hz), 111.9, 62.9 (dd,  $J = 29.2, 19.5$  Hz), 59.7 (d,  $J = 5.9$  Hz), 50.8 (t,  $J = 22.4$  Hz), 30.6 (d,  $J = 8.3$  Hz), 12.7;  $^{19}F$  NMR (282 MHz, MeOH- $d_4$ )  $\delta$  -109.8 (dt,  $J = 231.2, 7.6$  Hz, 1F), -121.9 (dddd,  $J = 230.7, 26.5, 15.5, 3.4$  Hz, 1F); IR (KBr)  $\nu_{max}$  3417, 3179, 3044, 1693, 1466, 1379, 1220  $cm^{-1}$ ; MS  $m/z$  279.0 ( $M^+ + H$ ), 301.0 ( $M^+ + Na$ ); HRMS Calcd for  $C_{10}H_{13}O_3N_2F_2S^+$  ( $M^+ + H$ ): 279.0614. Found: 279.0610.

**1-((2R,4S)-3,3-Difluoro-4-(hydroxymethyl)-tetrahydrothiophen-2-yl)-5-fluorouracil (23a) and 1-((2S,4S)-3,3-Difluoro-4-(hydroxymethyl)-tetrahydrothiophen-2-yl)-5-fluorouracil (23b)** Under the same conditions of Pummerer reaction as described above, Compound **20** (130 mg, 0.38 mmol) was condensed with silylated 5-fluorouracil to give  $\alpha$  isomer of protected 5-fluorouridine (47 mg) and  $\beta$  isomer of protected 5-fluorouridine (30 mg). Then the  $\alpha$  isomer was dissolved in saturated methanolic ammonia (8 mL) and methanol (4 mL) and stirred for 8 h. After removal of the volatile materials, the residue was purified by silica gel

chromatography (CH<sub>2</sub>Cl<sub>2</sub>: MeOH = 10: 1) to give compound **23a** (24 mg, 23% yield for three steps) as a white solid.

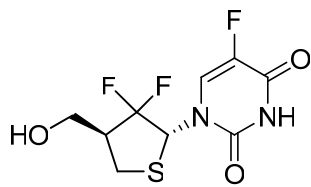

Compound **23a**: m.p. 212-213 °C;  $[\alpha]_D^{27} = -31.1^\circ$  (*c* 0.85 MeOH); <sup>1</sup>H NMR (300 MHz, MeOH-d<sub>4</sub>) δ 8.28 (d, *J* = 6.6 Hz, 1H), 6.32 (ddd, *J* = 11.7, 3.9, 1.2 Hz, 1H), 3.86 (dd, *J* = 11.4, 5.1 Hz, 1H), 3.72 (dd, *J* = 11.4, 7.2 Hz, 1H), 3.41 (dd, *J* = 10.5, 7.5 Hz, 1H), 2.87 (t, *J* = 9.9 Hz, 1H), 2.82-2.65 (m, 1H); <sup>13</sup>C NMR (100.7 MHz, MeOH-d<sub>4</sub>) δ 157.6 (d, *J* = 26.4 Hz), 149.9, 140.1 (d, *J* = 235.2 Hz), 127.5 (dd, *J* = 261.4, 257.1 Hz), 125.3 (d, *J* = 35.9 Hz), 63.1 (dd, *J* = 39.1, 21.1 Hz), 58.0 (d, *J* = 5.0 Hz), 27.5 (t, *J* = 7.3 Hz); <sup>19</sup>F NMR (282 MHz, MeOH-d<sub>4</sub>) δ -111.3 (ddd, *J* = 236.1, 9.6, 4.5 Hz, 1F), -113.8 (ddd, *J* = 236.3, 20.5, 11.5 Hz, 1F), -167.4 (d, *J* = 8.4 Hz, 1F); IR (KBr)  $\nu_{\max}$  3401, 3018, 1724, 1688, 1386, 1099 cm<sup>-1</sup>; MS *m/z* 283.0 (M<sup>+</sup>+H); HRMS Calcd for C<sub>9</sub>H<sub>10</sub>O<sub>3</sub>N<sub>2</sub>F<sub>3</sub>S (M<sup>+</sup> + H): 283.0361. Found: 283.0359.

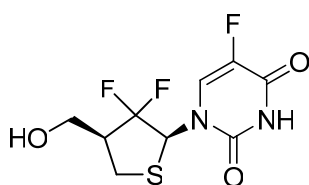

Compound **23b** (16 mg, 15% yield for three steps) was prepared from the β isomer of protected 5-fluorouridine using the same conditions as for compound **23a**. white solid: m.p. 218-220 °C;  $[\alpha]_D^{27} = -18.9^\circ$  (*c* 0.45 MeOH); <sup>1</sup>H NMR (300 MHz, MeOH-d<sub>4</sub>) δ 8.08 (dd, *J* = 6.9, 3.0 Hz, 1H), 6.58 (dd, *J* = 15.0, 8.1 Hz, 1H), 3.85 (dd, *J* = 11.7, 4.8 Hz, 1H), 3.64 (dd, *J* = 11.4, 7.5 Hz, 1H), 3.22-3.07 (m, 2H), 3.02-2.83 (m, 1H); <sup>13</sup>C NMR (100.7 MHz, MeOH-d<sub>4</sub>) δ 158.1 (d, *J* = 29.9

Hz), 150.1, 140.4 (d,  $J = 235.1$  Hz), 126.4 (t,  $J = 261.2$  Hz), 126.5 (dd,  $J = 35.5, 4.6$  Hz), 61.9 (dd,  $J = 28.7, 20.0$  Hz), 57.9 (d,  $J = 6.5$  Hz), 49.1 (t,  $J = 22.0$  Hz), 28.9 (d,  $J = 8.6$  Hz);  $^{19}\text{F}$  NMR (282 MHz, MeOH- $\text{d}_4$ )  $\delta$  -109.5 (dd,  $J = 230.1, 6.2$  Hz, 1F), -121.7 (ddd,  $J = 230.9, 21.4, 13.8$  Hz, 1F), -167.1 (s, 1F); IR (KBr)  $\text{max}$  3460, 3057, 1704, 1665, 1390, 1390, 1116  $\text{cm}^{-1}$ ; MS  $m/z$  305.2 ( $\text{M}^+ + \text{Na}$ ); HRMS Calcd for  $\text{C}_9\text{H}_9\text{N}_2\text{O}_3\text{F}_3\text{SNa}$  ( $\text{M}^+ + \text{Na}$ ): 305.0188. Found: 305.0178.

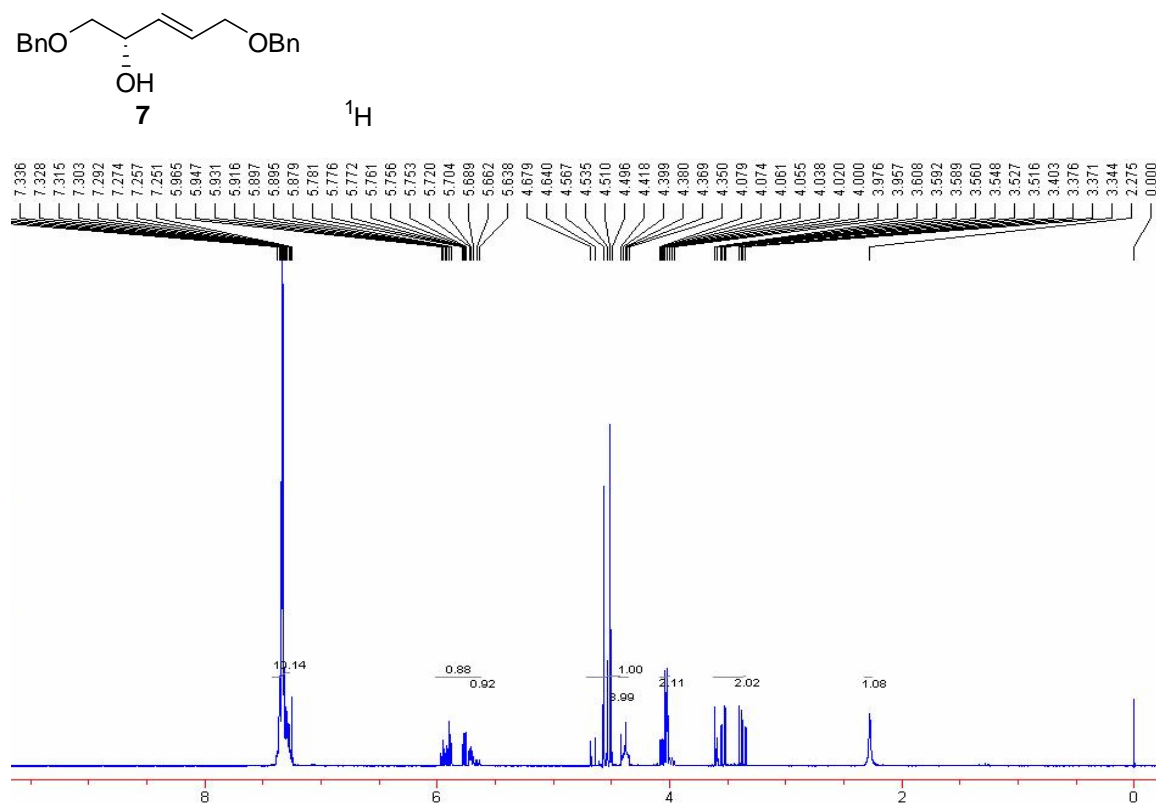

### Chiral HPLC analytical data of compound **7**

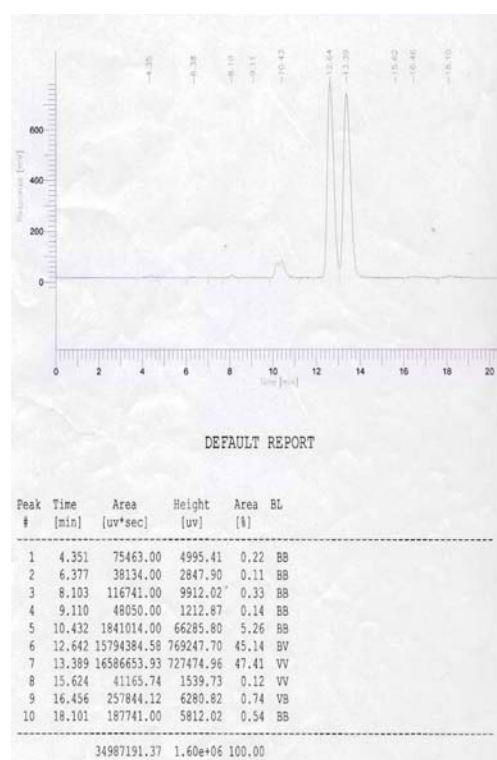

*authentic racemic*

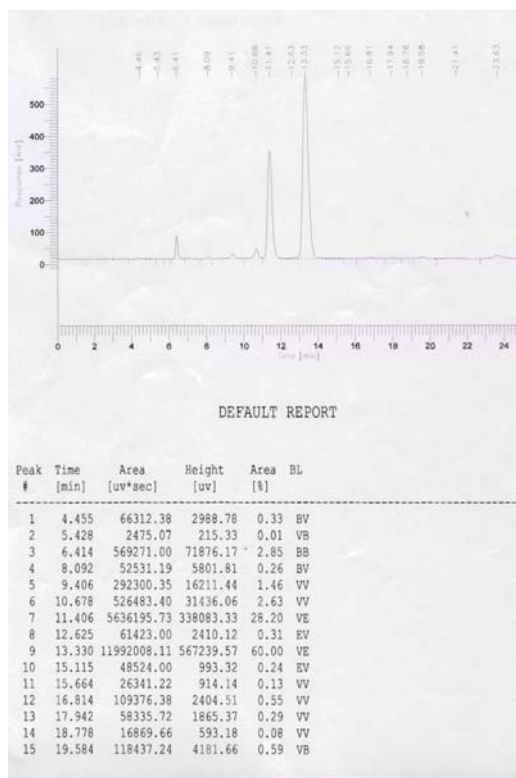

*99% ee*

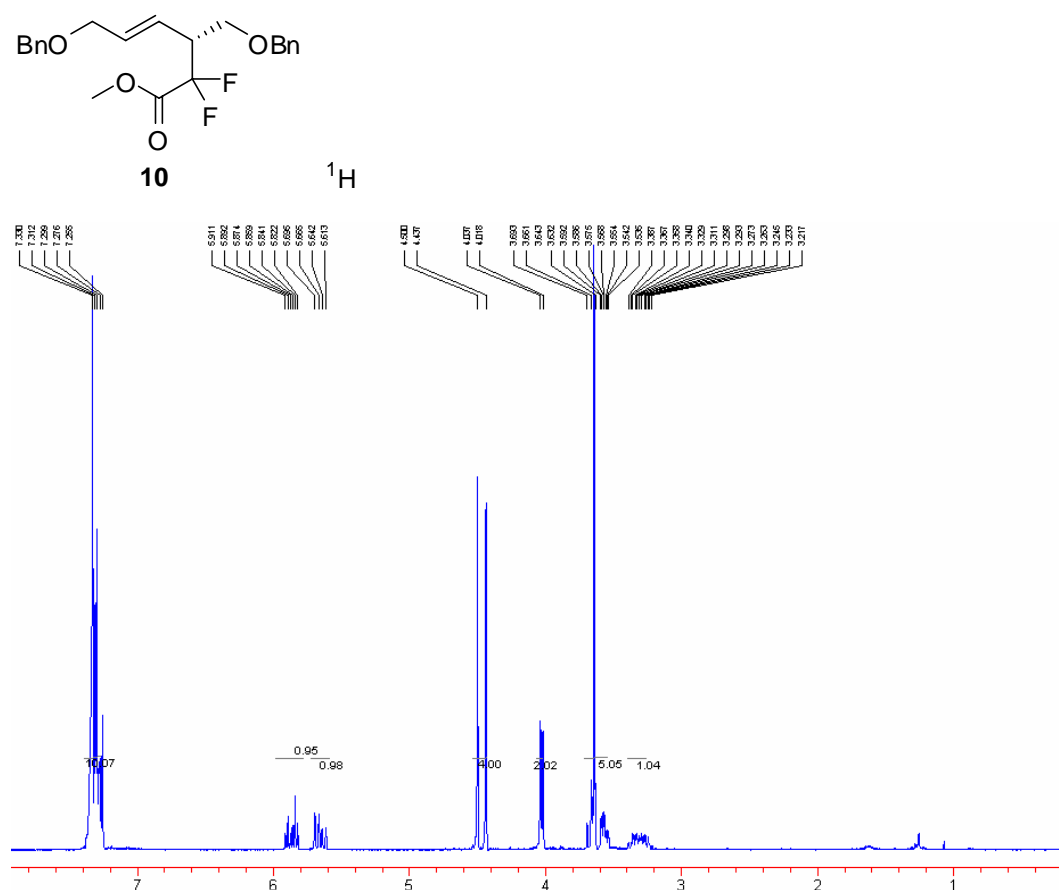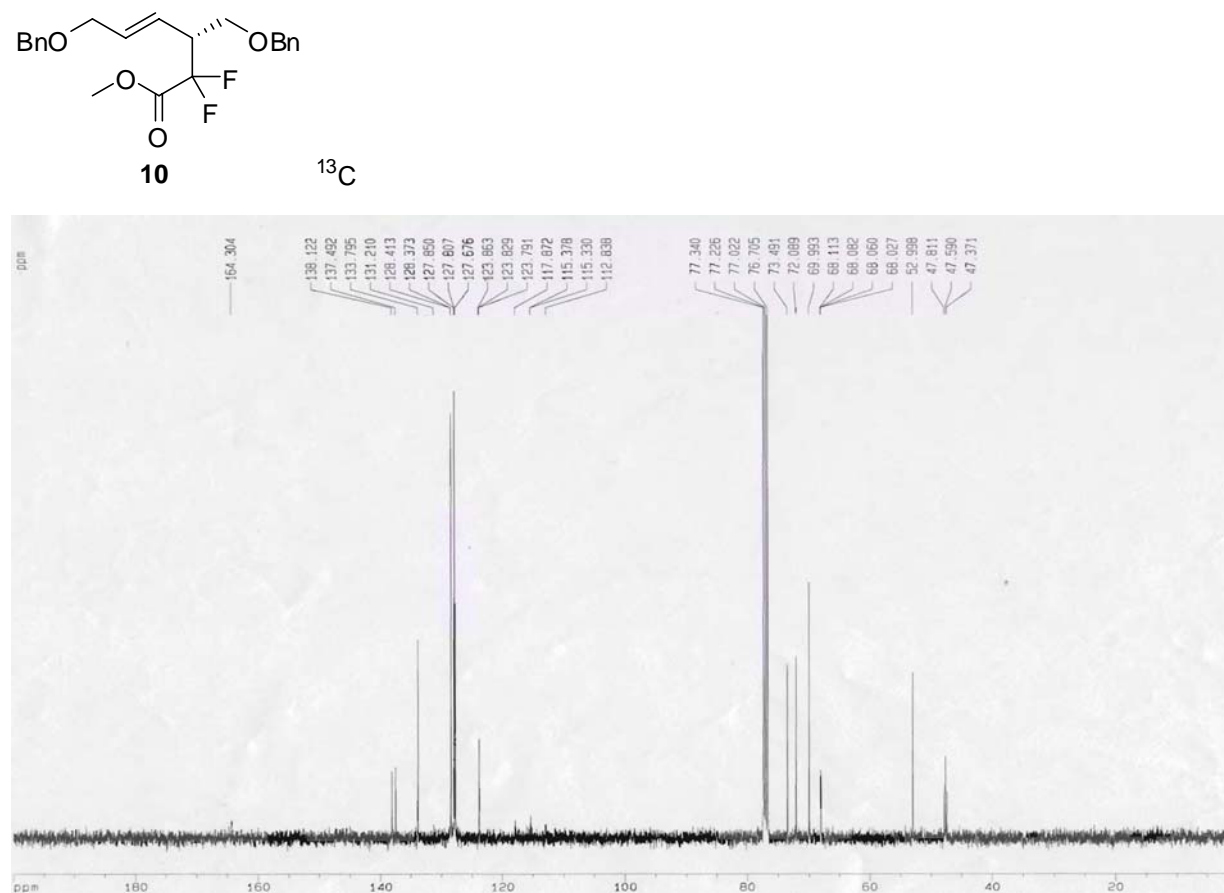

# Chiral HPLC analytical data of compound **10**

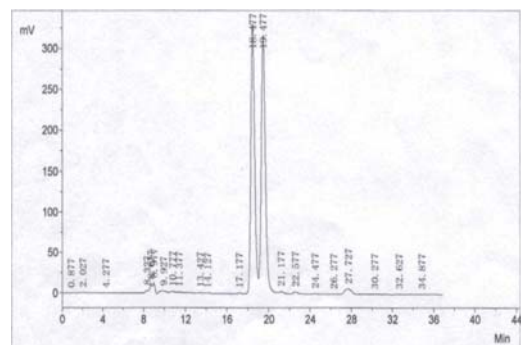

| 序号  | 峰号 | 组份名 | 保留时间   | 峰高       | 峰面积        | 面积百分比(%) |
|-----|----|-----|--------|----------|------------|----------|
| 1   | 1  |     | 0.877  | 76.1     | 1987.4     | 0.0106   |
| 2   | 2  |     | 2.027  | 972.3    | 54203.7    | 0.2887   |
| 3   | 3  |     | 4.277  | 191.8    | 7837.7     | 0.0417   |
| 4   | 4  |     | 8.327  | 3590.8   | 82187.4    | 0.4377   |
| 5   | 5  |     | 8.677  | 10702.5  | 166056.3   | 0.8844   |
| 6   | 6  |     | 8.977  | 12742.5  | 184861.8   | 0.9845   |
| 7   | 7  |     | 9.927  | 3662.2   | 173942.5   | 0.9264   |
| 8   | 8  |     | 10.777 | 2896.2   | 113252.4   | 0.6031   |
| 9   | 9  |     | 11.377 | 2201.1   | 151056.2   | 0.8045   |
| 10  | 10 |     | 13.427 | 982.3    | 32984.9    | 0.1757   |
| 11  | 11 |     | 14.127 | 345.8    | 9089.3     | 0.0484   |
| 12  | 12 |     | 17.177 | 608.2    | 22545.3    | 0.1201   |
| 13  | 13 |     | 18.477 | 329347.4 | 8428113.3  | 44.8853  |
| 14  | 14 |     | 19.477 | 317762.6 | 8875231.1  | 47.2665  |
| 15  | 15 |     | 21.177 | 1603.8   | 37072.7    | 0.1974   |
| 16  | 16 |     | 22.577 | 2147.4   | 65110.6    | 0.3468   |
| 17  | 17 |     | 24.477 | 531.7    | 16917.3    | 0.0901   |
| 18  | 18 |     | 26.277 | 267.0    | 6719.8     | 0.0358   |
| 19  | 19 |     | 27.727 | 6462.8   | 313049.3   | 1.6672   |
| 20  | 20 |     | 30.277 | 207.9    | 6228.8     | 0.0332   |
| 21  | 21 |     | 32.627 | 416.6    | 14040.3    | 0.0748   |
| 22  | 22 |     | 34.877 | 248.3    | 14527.0    | 0.0774   |
| 合计: |    |     |        | 697967.3 | 18777015.2 | 100.0000 |

*authentic racemic*

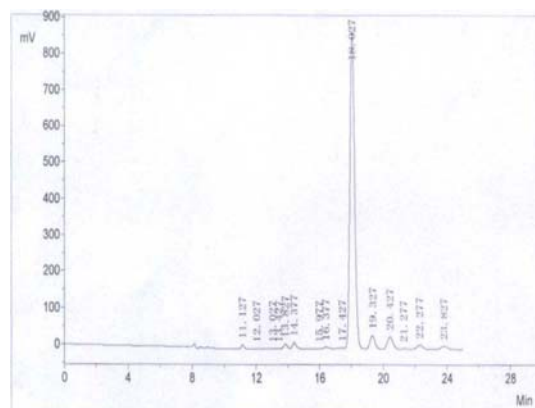

| 序号  | 峰号 | 组份名 | 保留时间   | 峰高        | 峰面积        | 面积百分比(%) |
|-----|----|-----|--------|-----------|------------|----------|
| 1   | 1  |     | 11.127 | 10214.1   | 125408.3   | 0.5958   |
| 2   | 2  |     | 12.027 | 374.3     | 7468.2     | 0.0355   |
| 3   | 3  |     | 13.027 | 1060.0    | 16484.5    | 0.0783   |
| 4   | 4  |     | 13.427 | 720.8     | 10641.2    | 0.0506   |
| 5   | 5  |     | 13.827 | 13683.9   | 213498.6   | 1.0143   |
| 6   | 6  |     | 14.377 | 16898.5   | 296095.2   | 1.4067   |
| 7   | 7  |     | 15.977 | 743.9     | 10322.8    | 0.0490   |
| 8   | 8  |     | 16.377 | 5214.2    | 120404.9   | 0.5720   |
| 9   | 9  |     | 17.427 | 3142.8    | 80600.7    | 0.3829   |
| 10  | 10 |     | 18.027 | 862443.0  | 17971485.3 | 85.3769  |
| 11  | 11 |     | 19.327 | 36646.3   | 799102.0   | 3.7963   |
| 12  | 12 |     | 20.427 | 33357.5   | 833011.4   | 3.9574   |
| 13  | 13 |     | 21.277 | 1484.9    | 29696.2    | 0.1411   |
| 14  | 14 |     | 22.277 | 11278.2   | 285794.2   | 1.3577   |
| 15  | 15 |     | 23.827 | 9110.5    | 249562.2   | 1.1856   |
| 合计: |    |     |        | 1006372.9 | 21049575.7 | 100.0000 |

*90% ee*

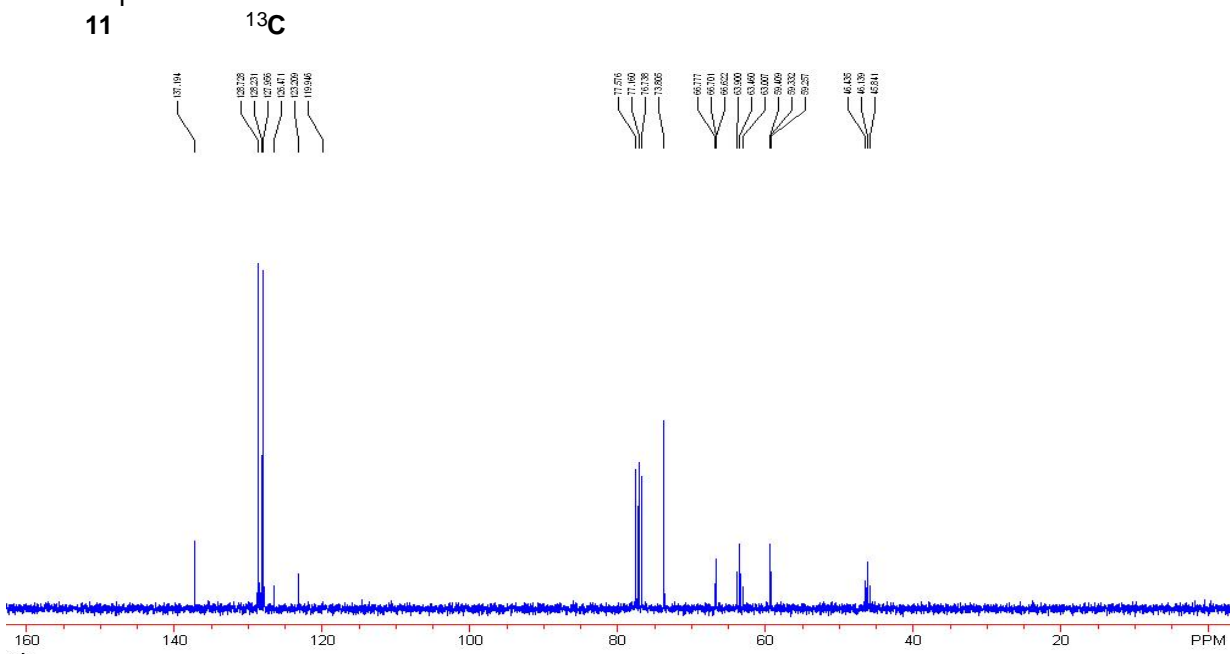

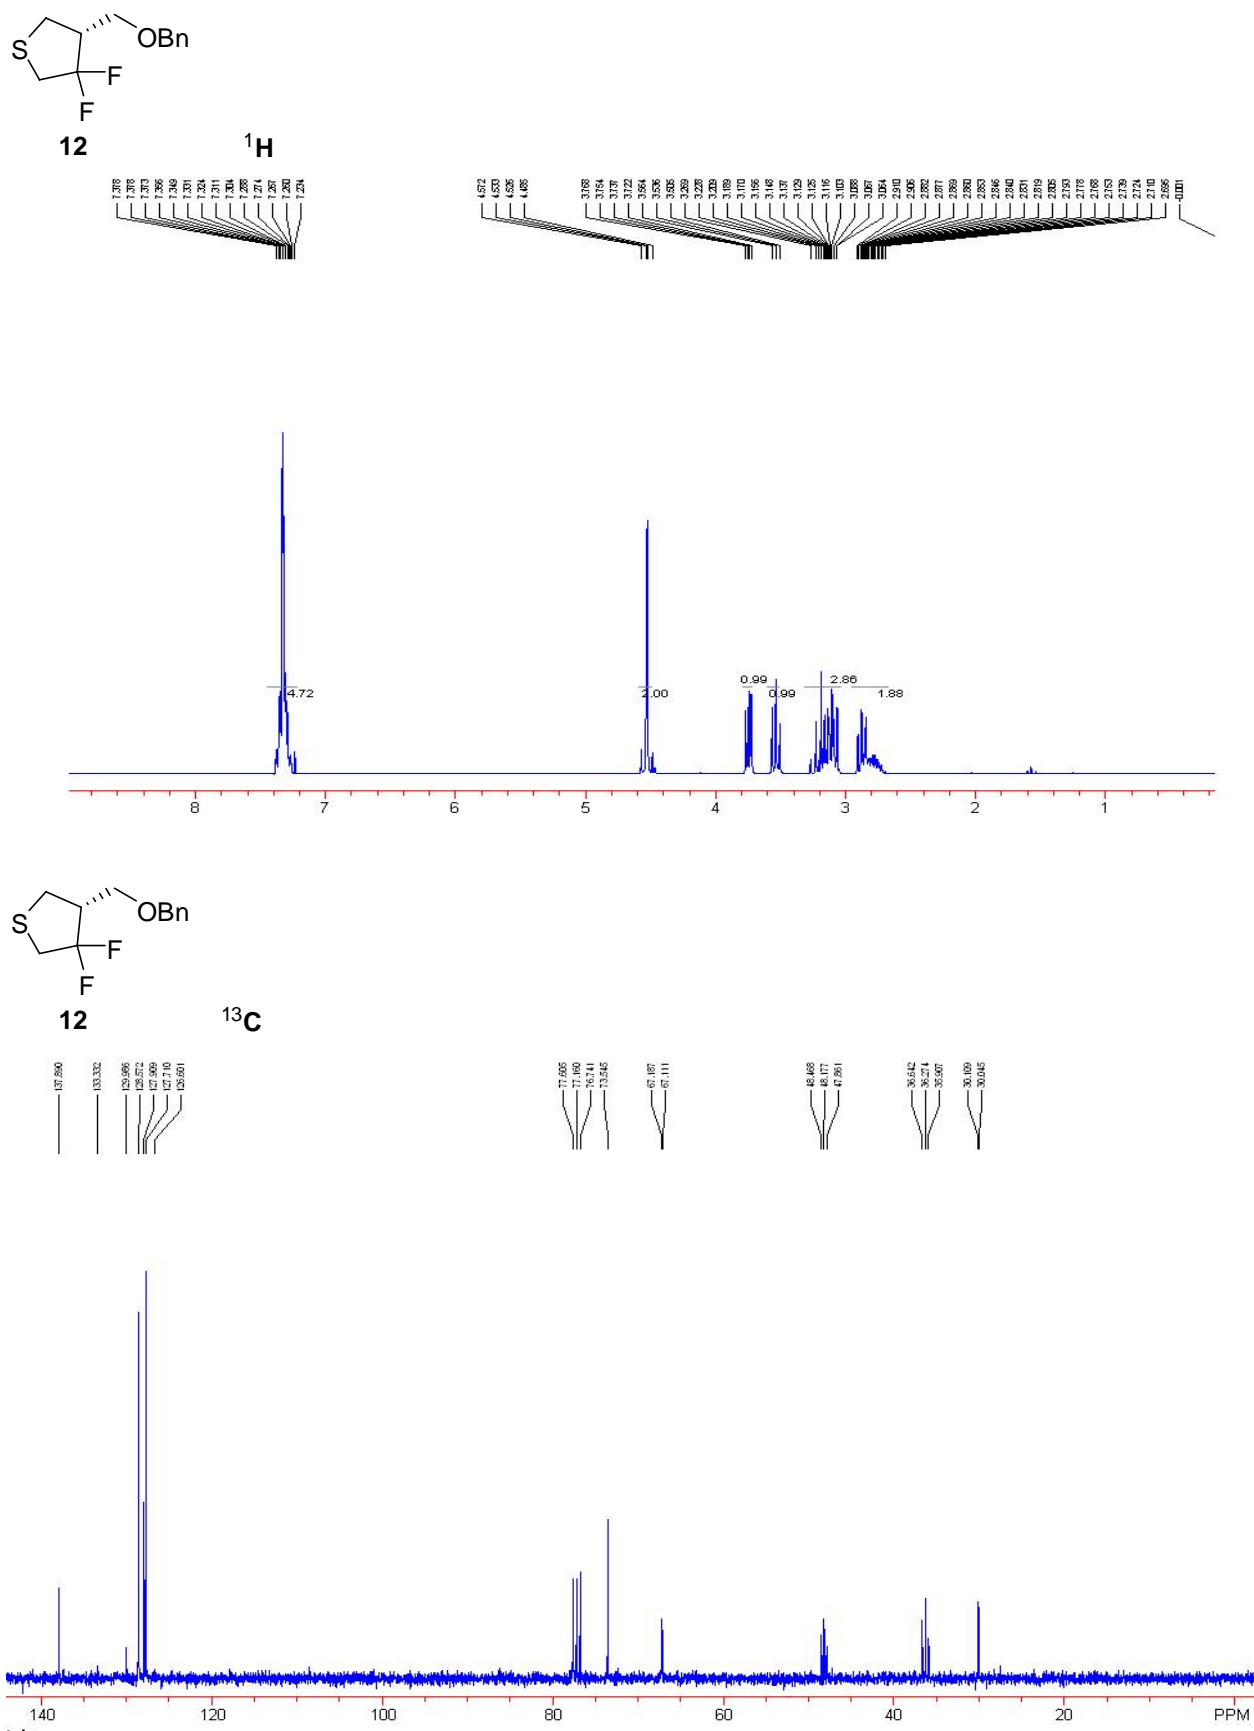

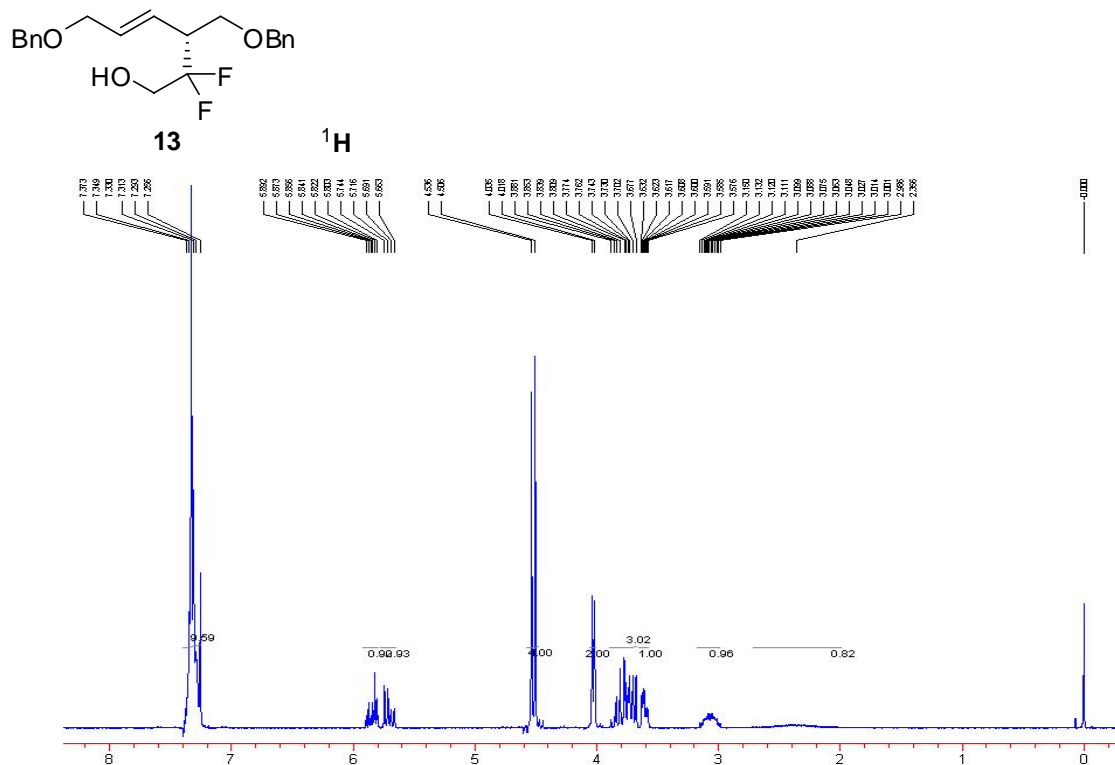

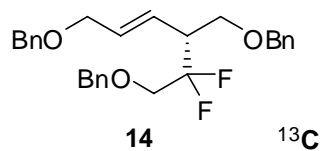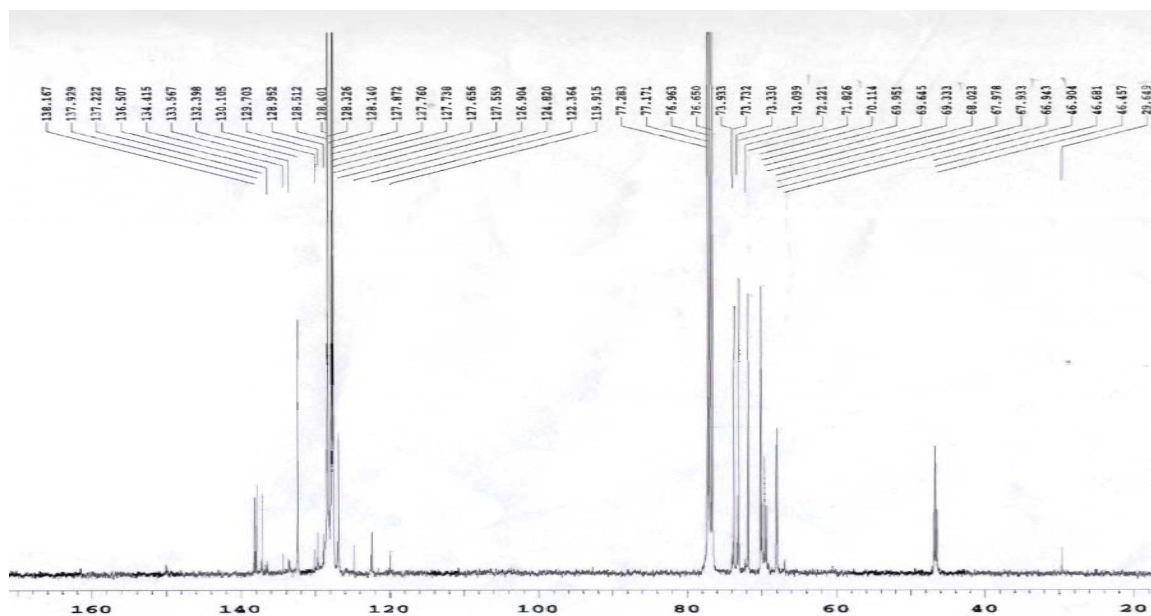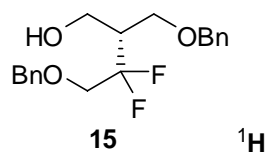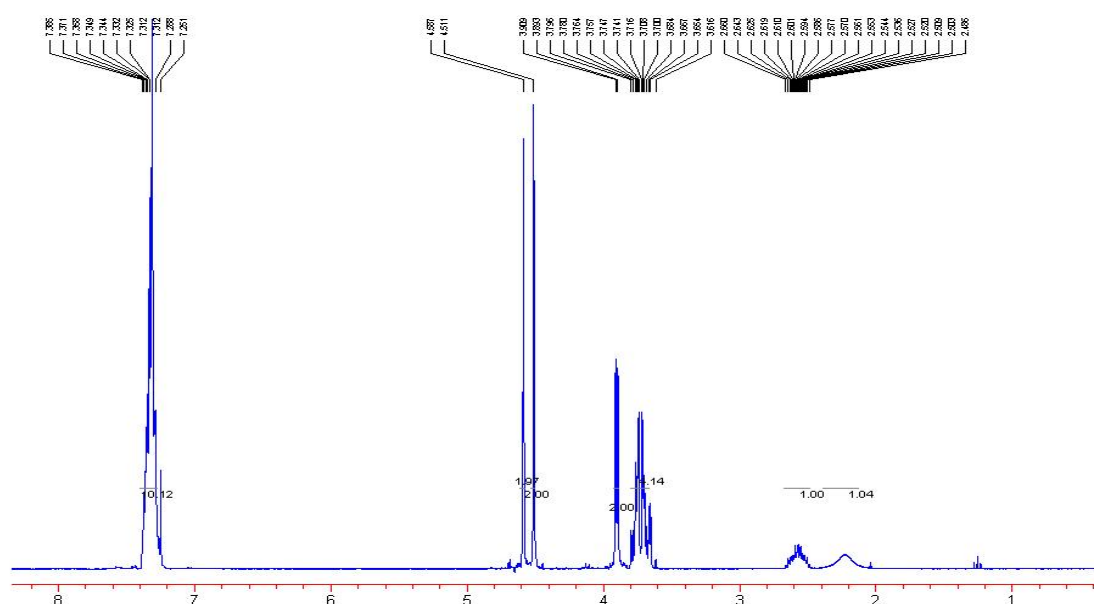

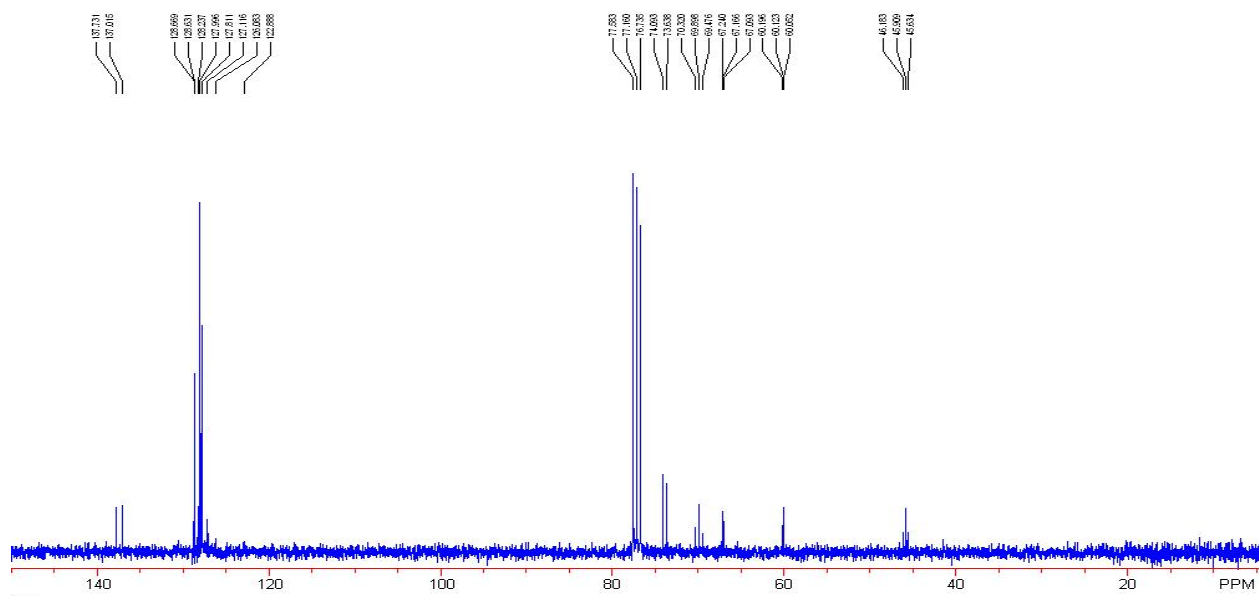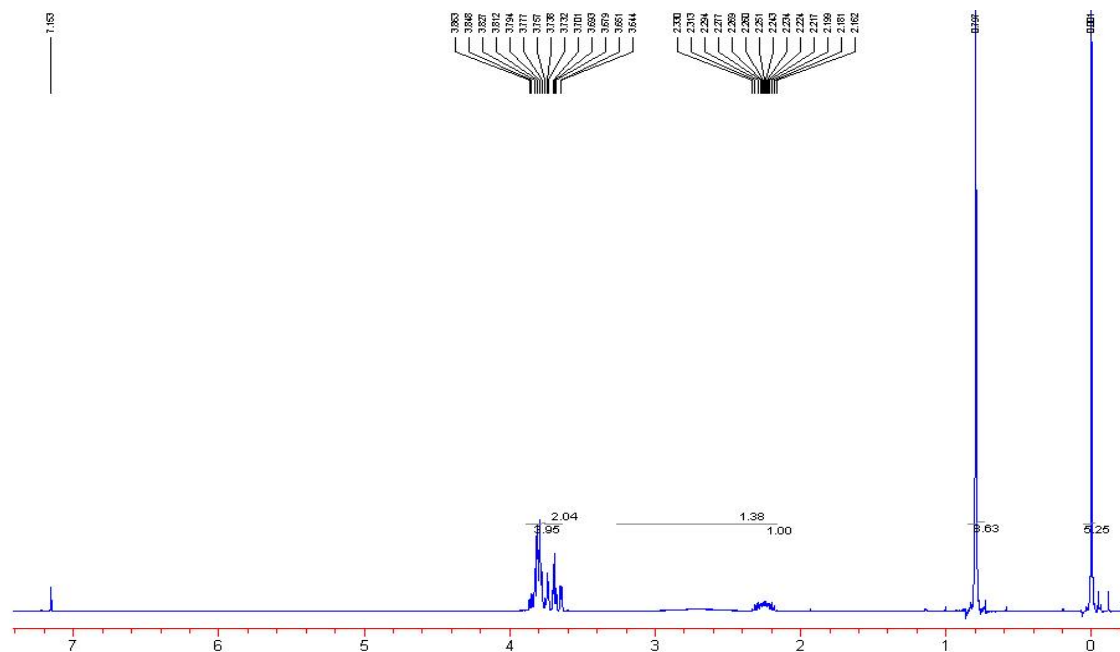

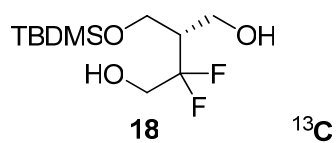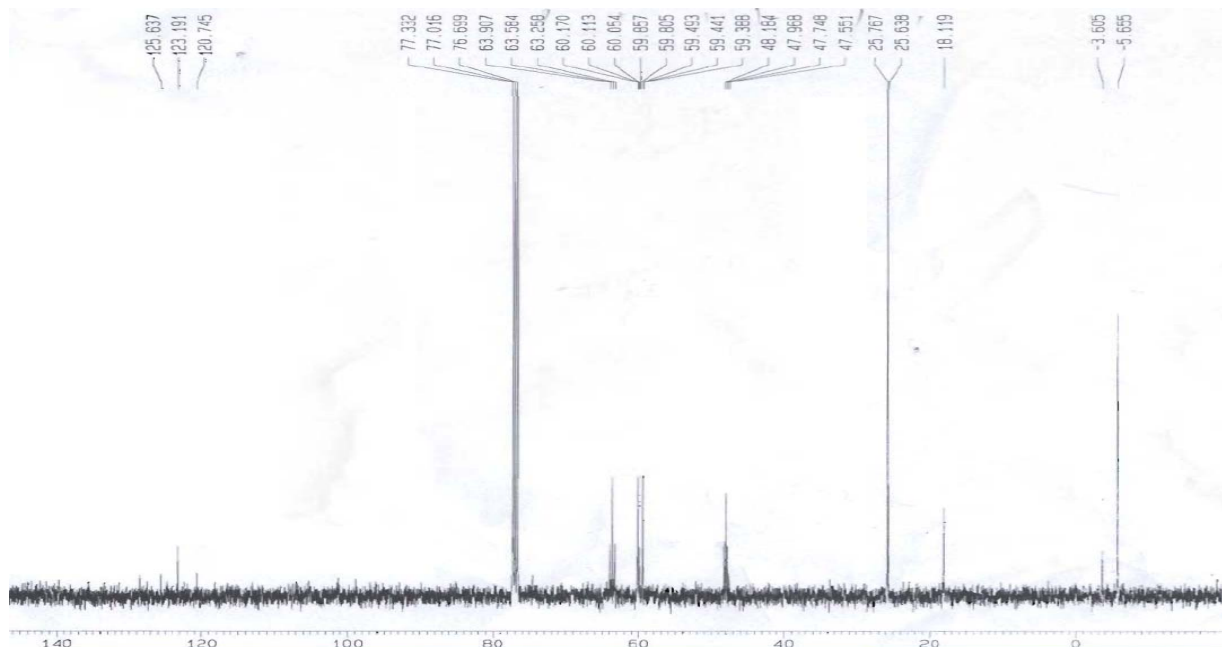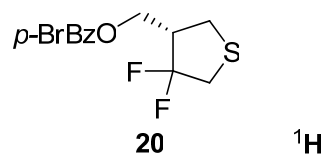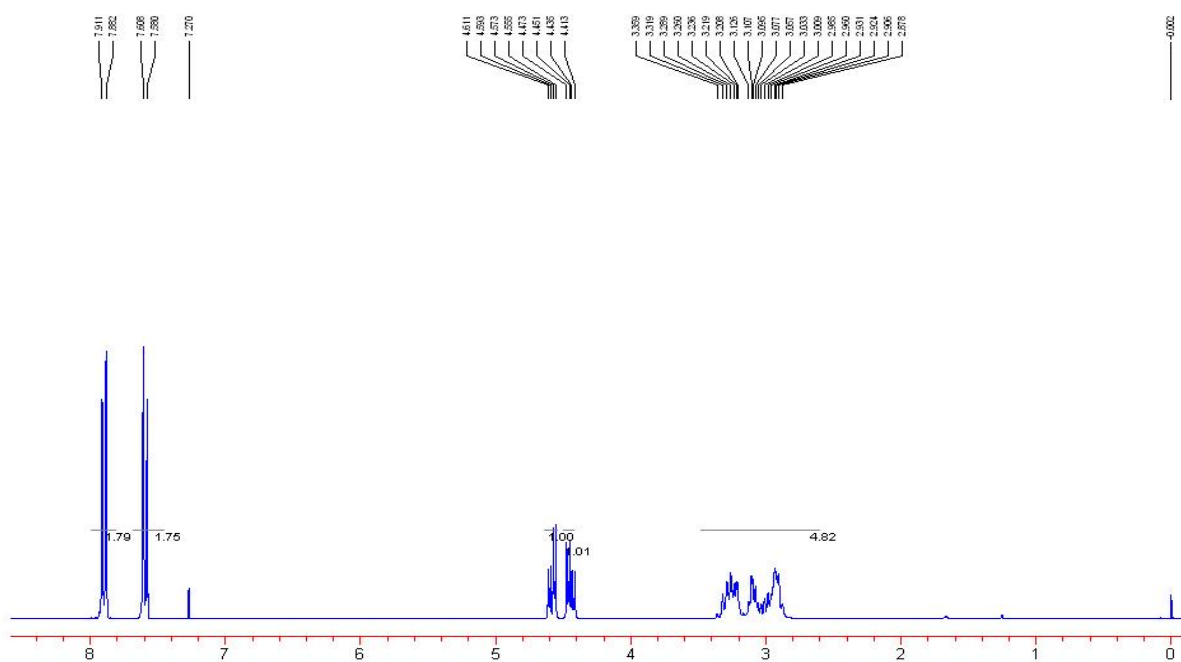

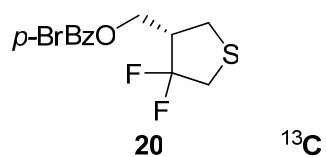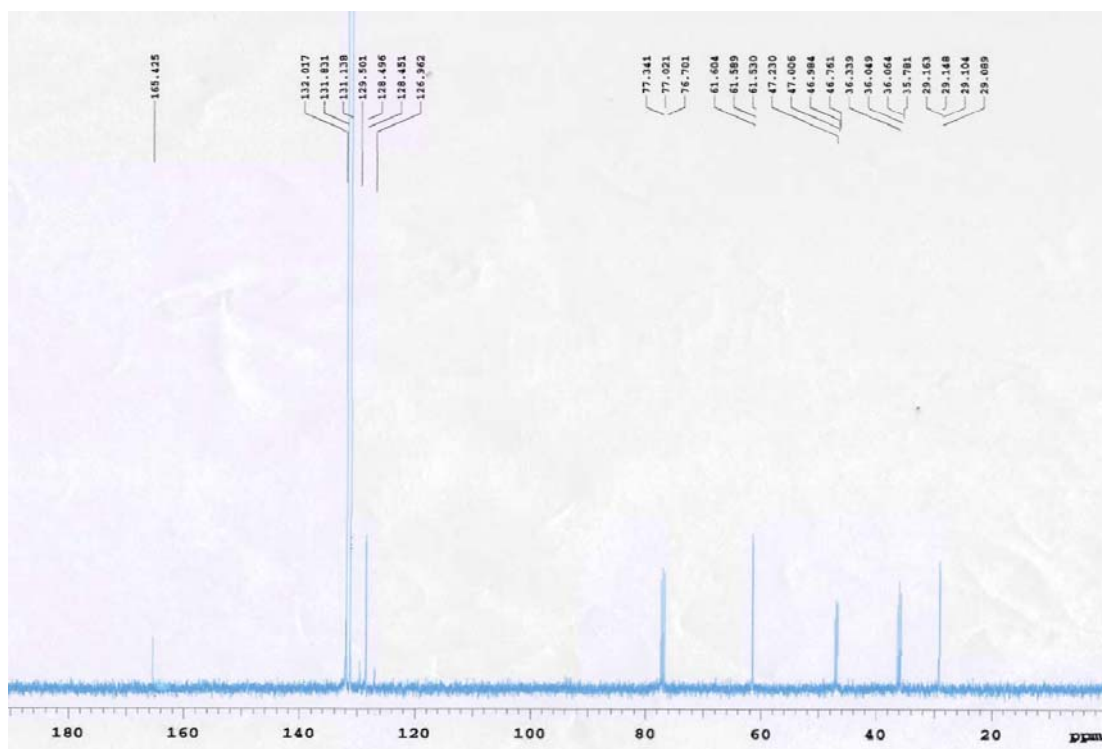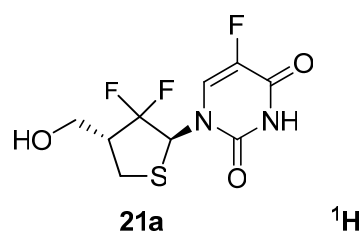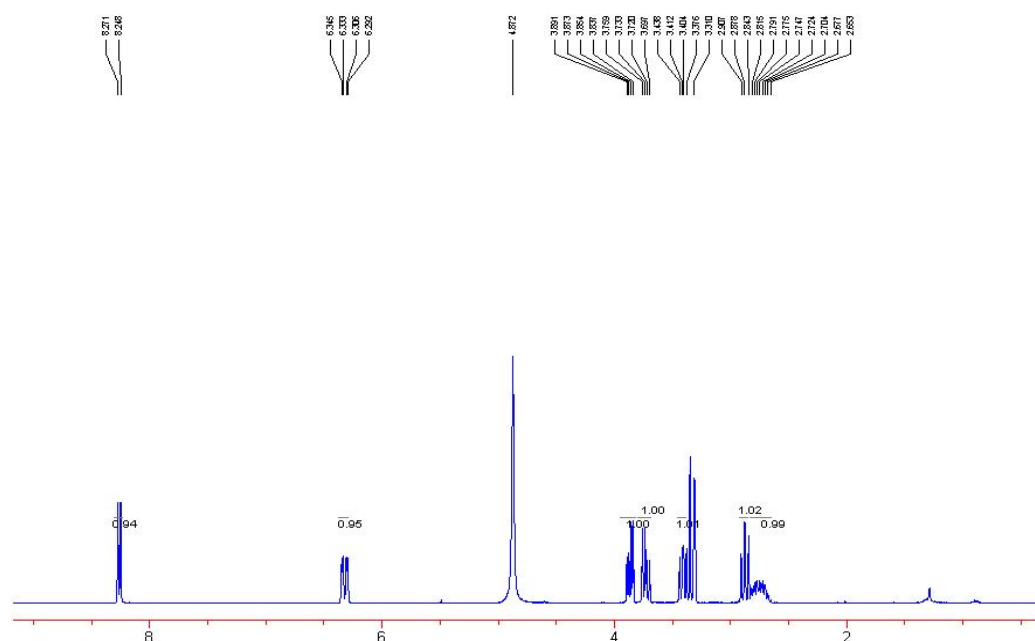

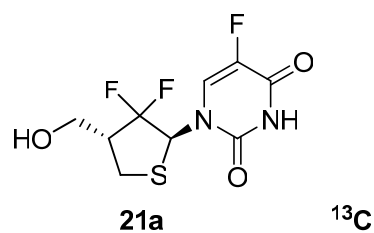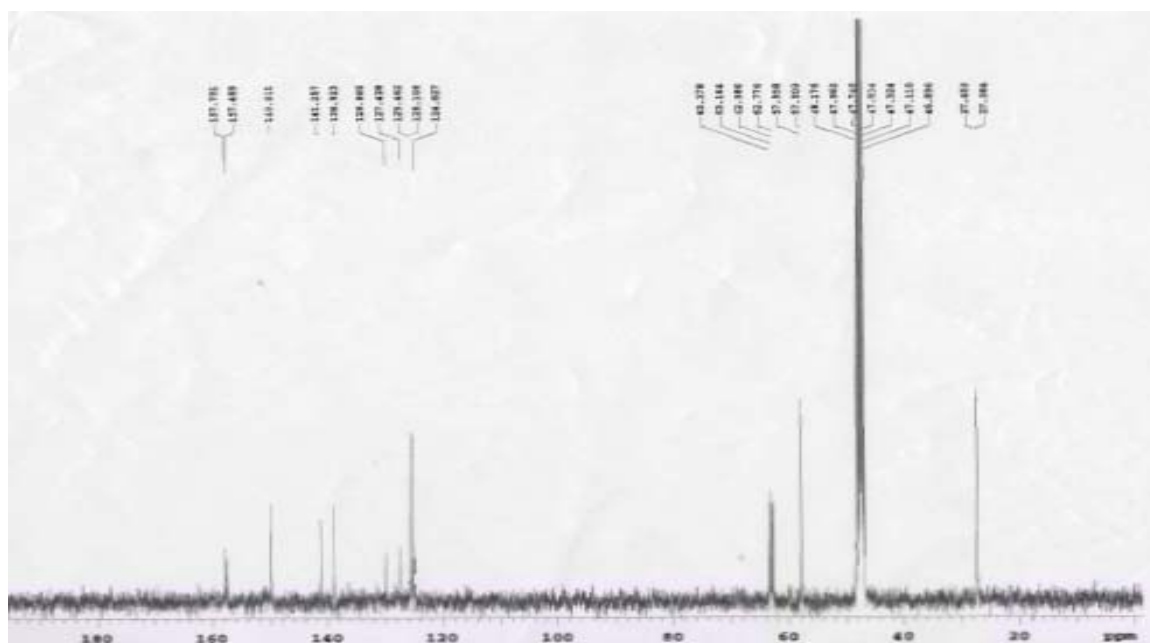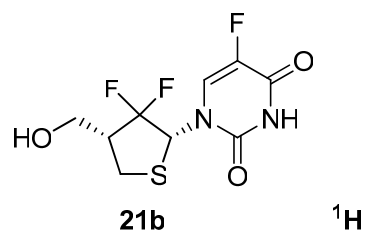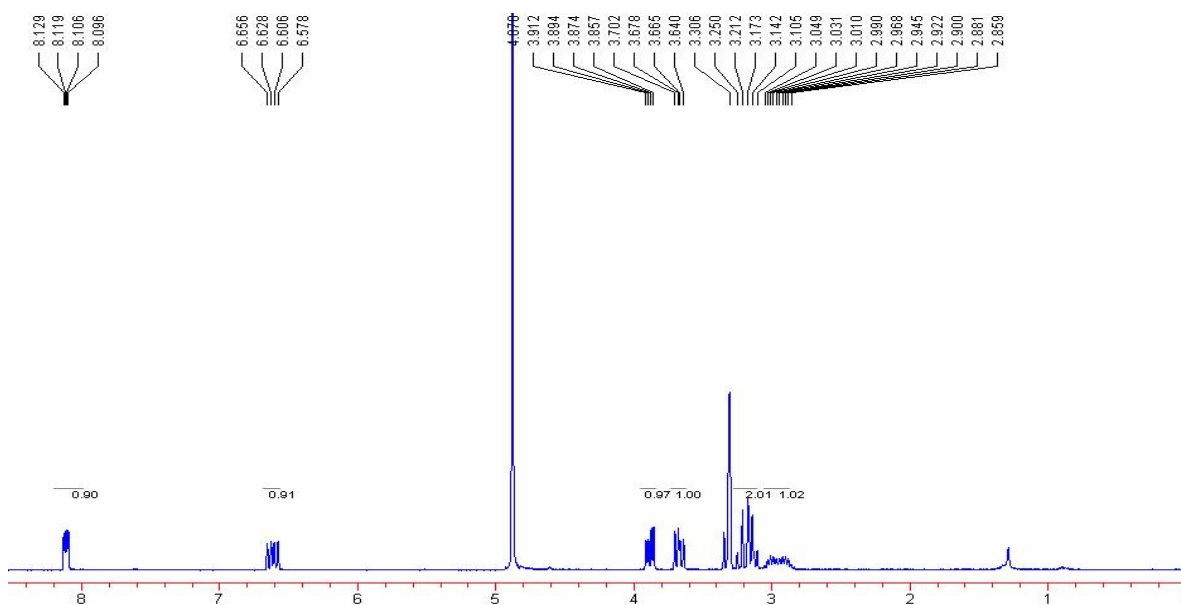

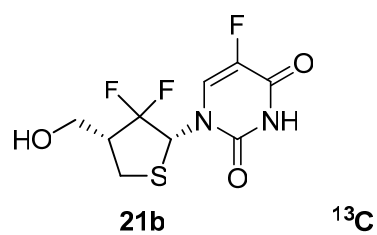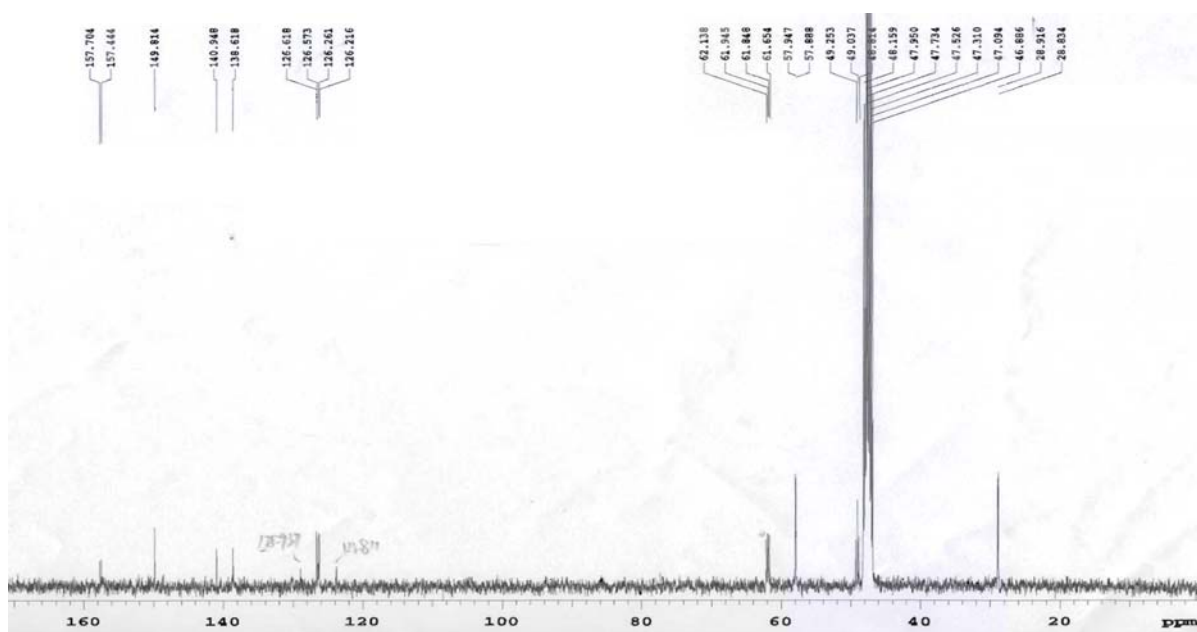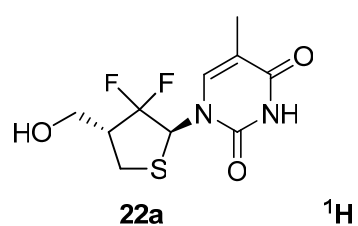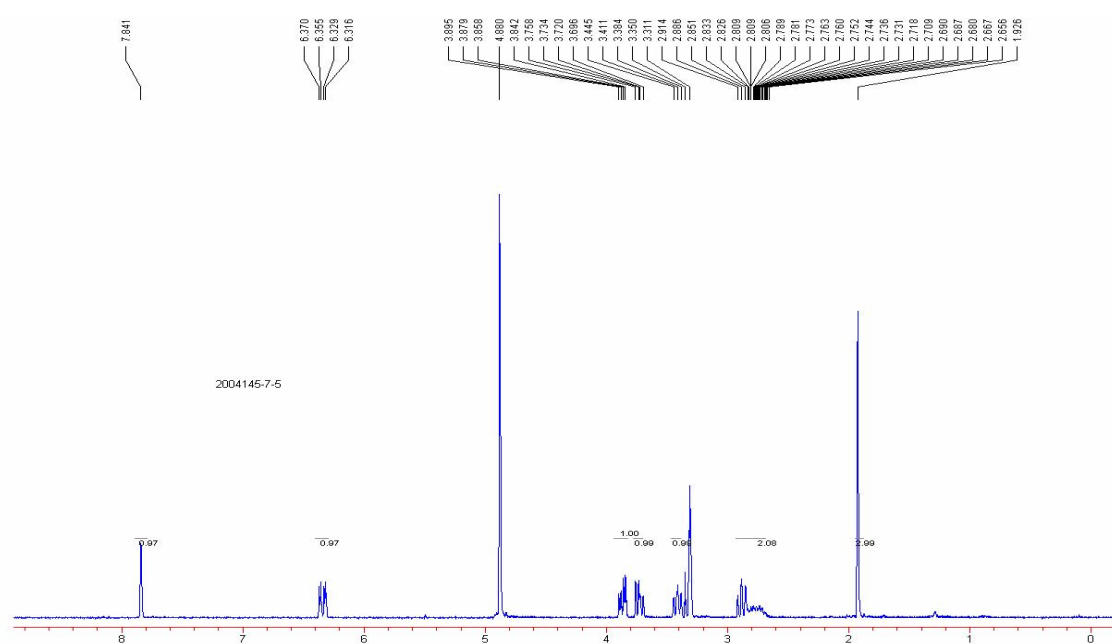

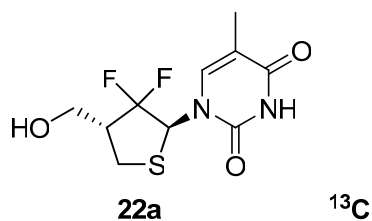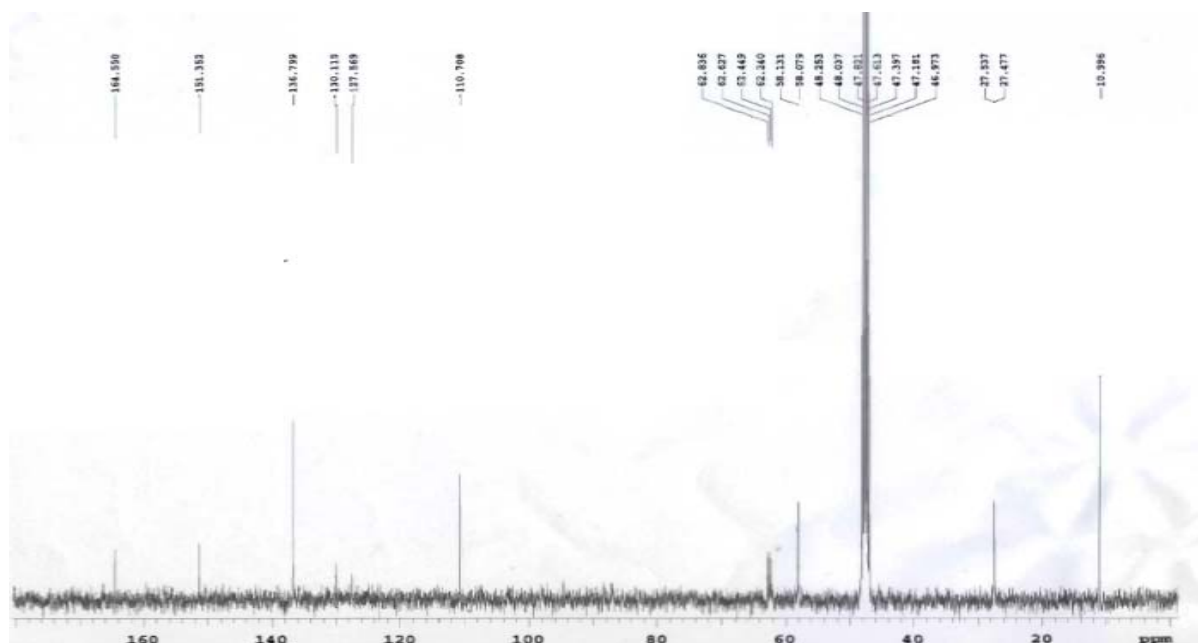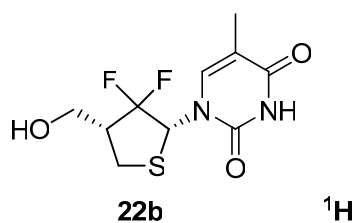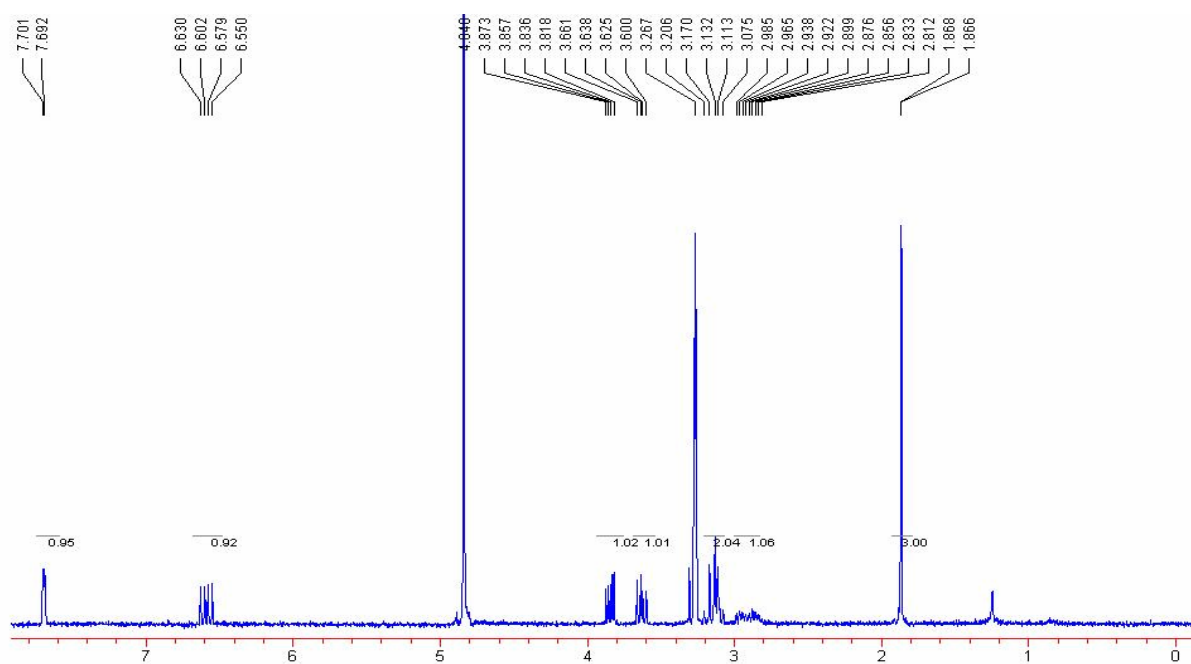

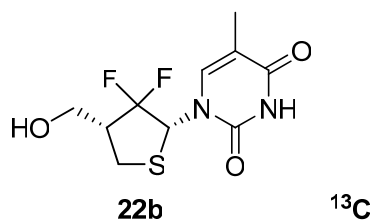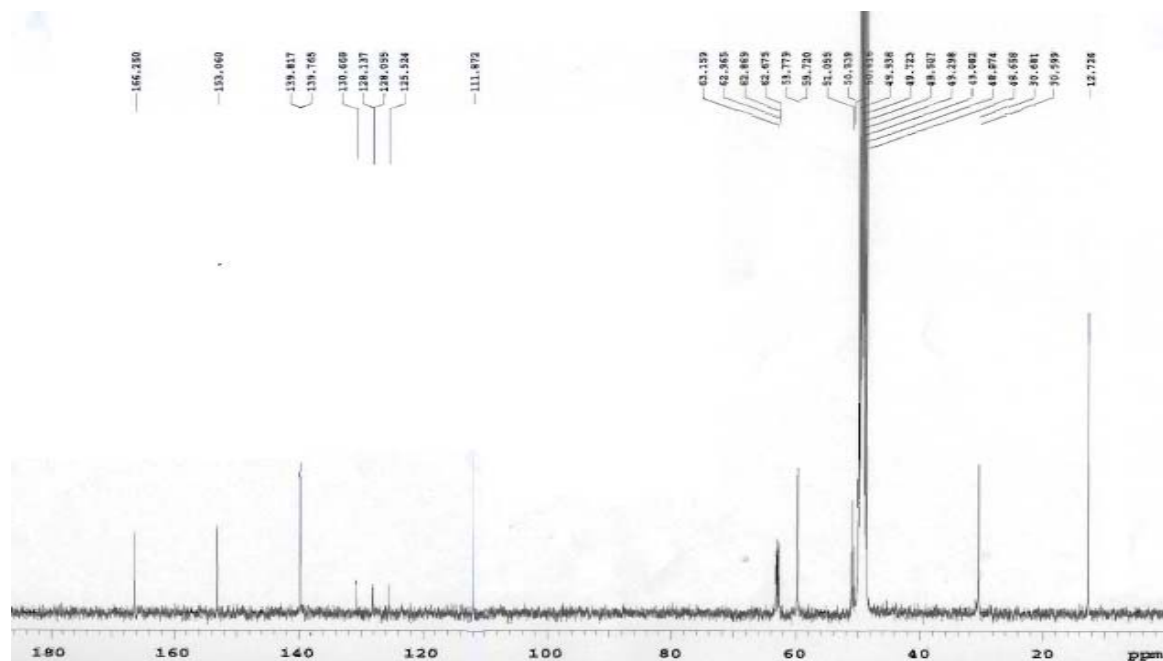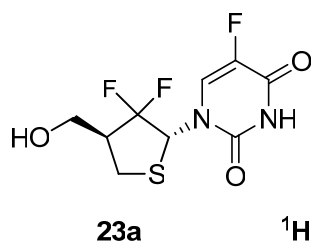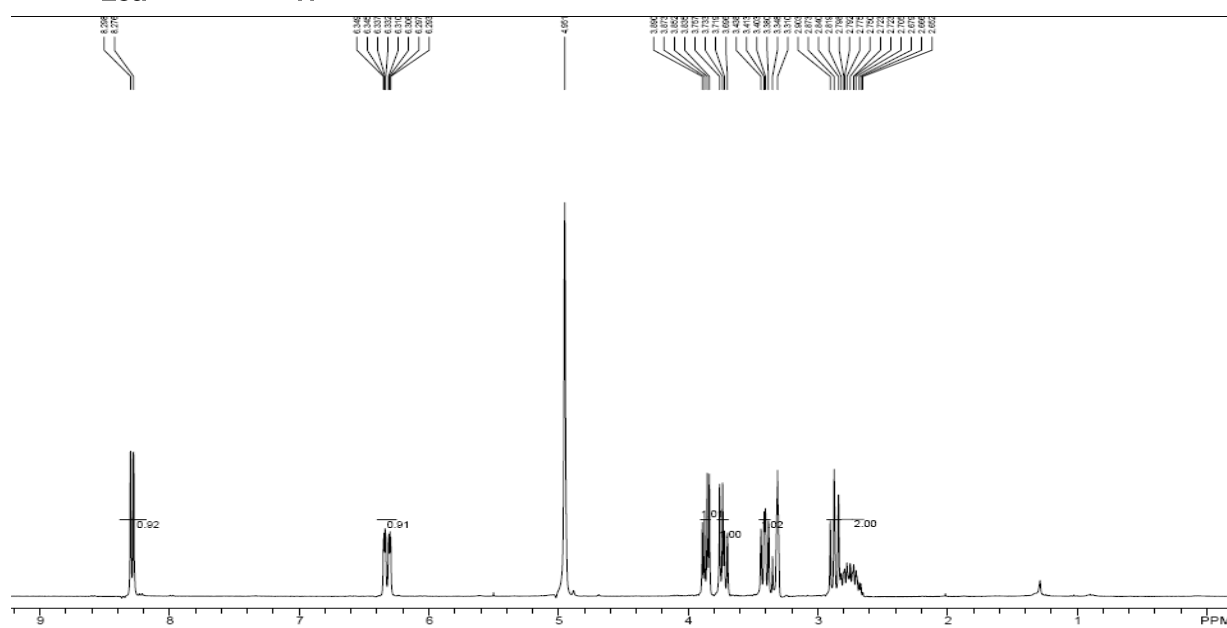

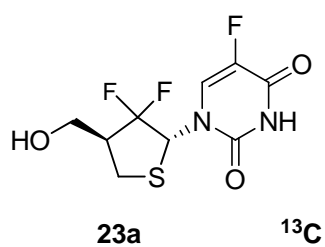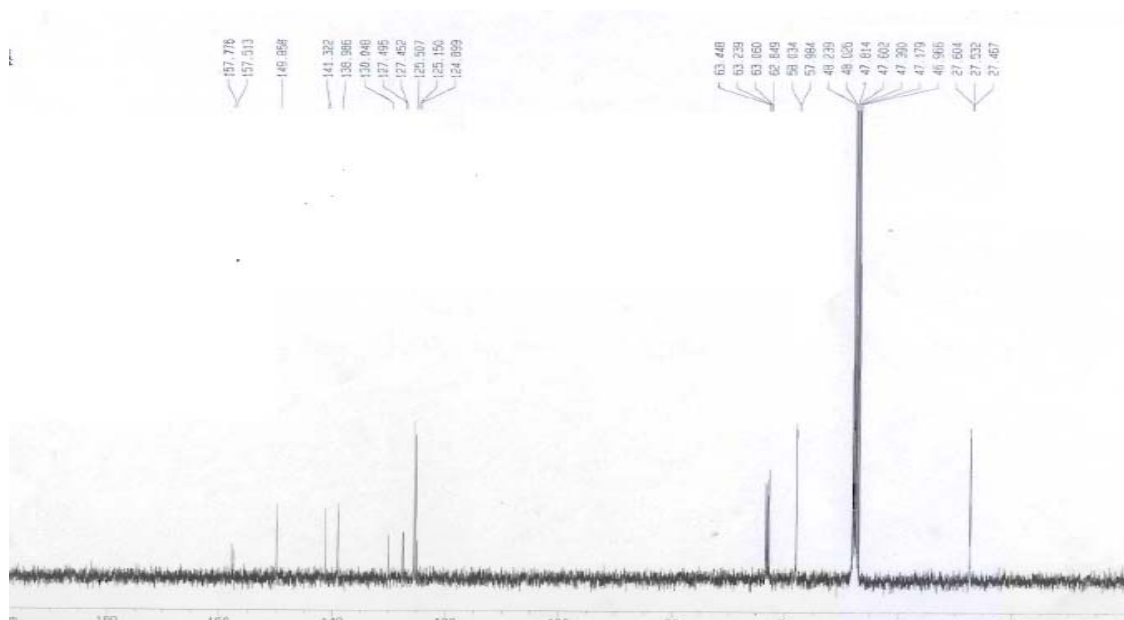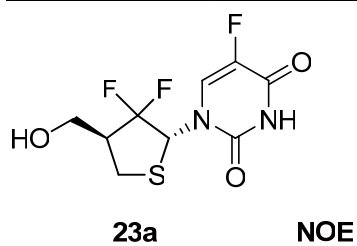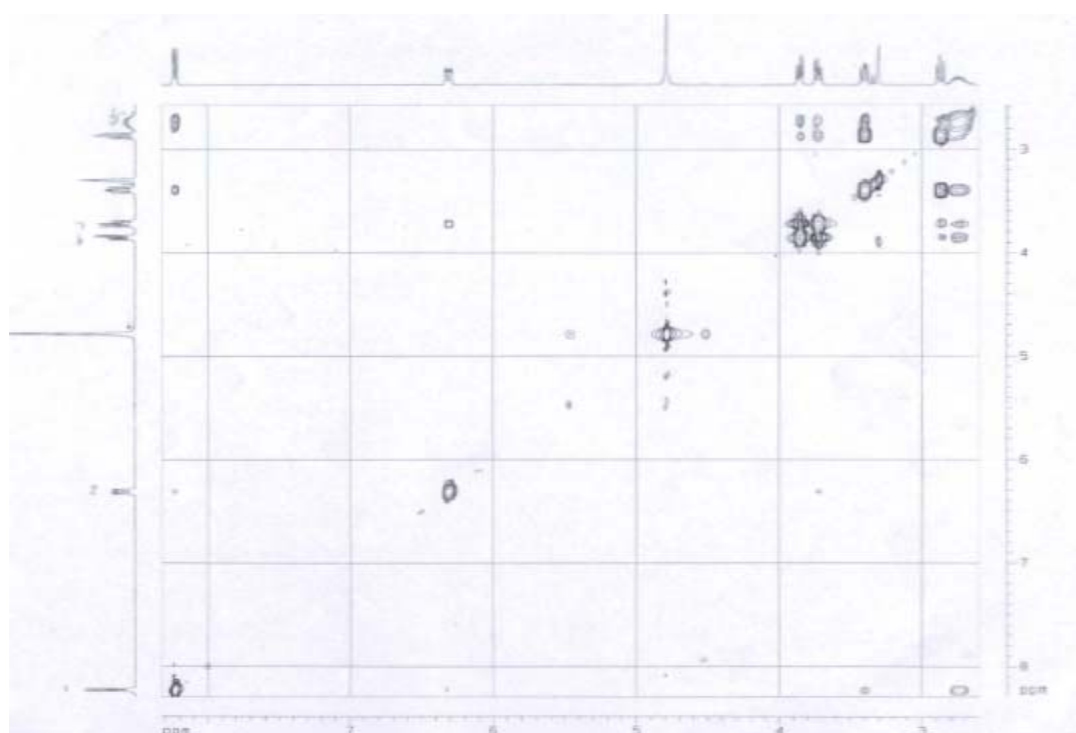

# X-ray crystal structure of compound **23a**

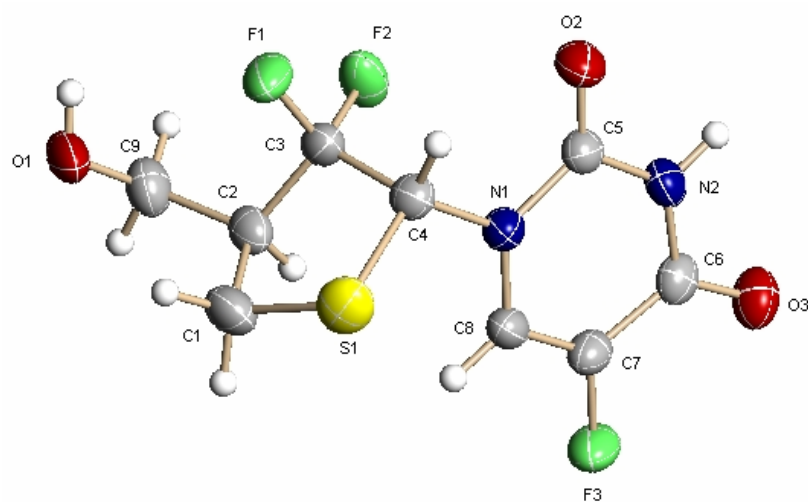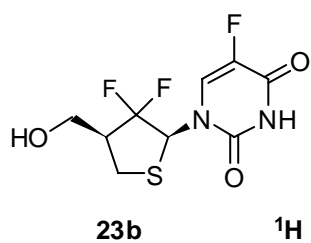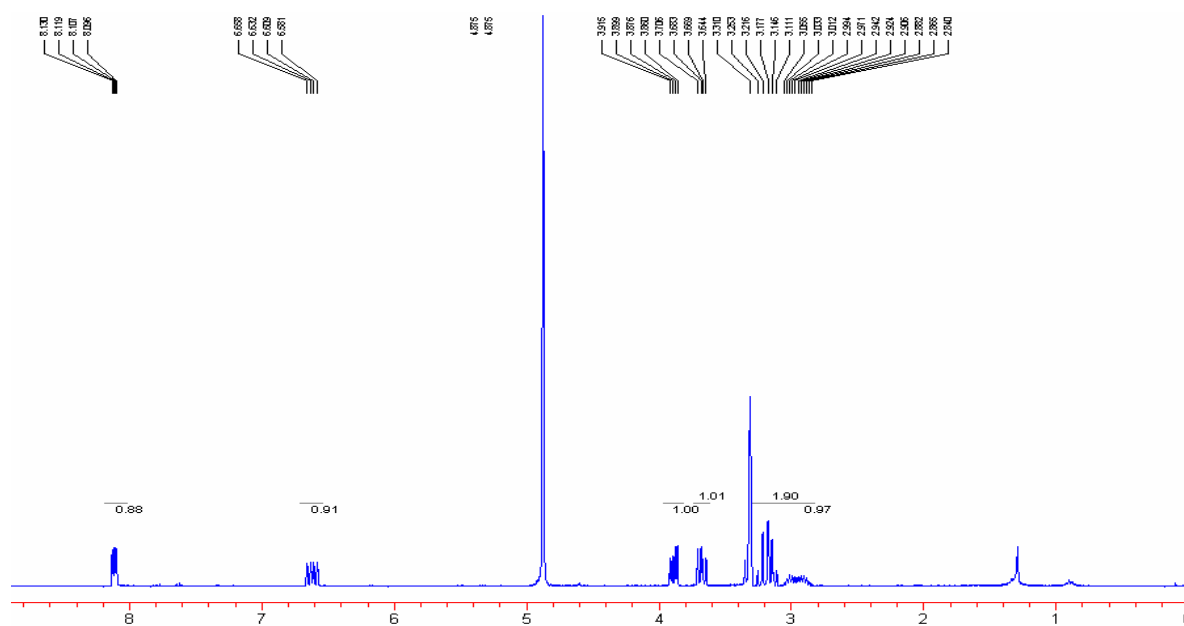

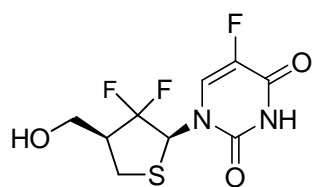

23b

<sup>13</sup>C

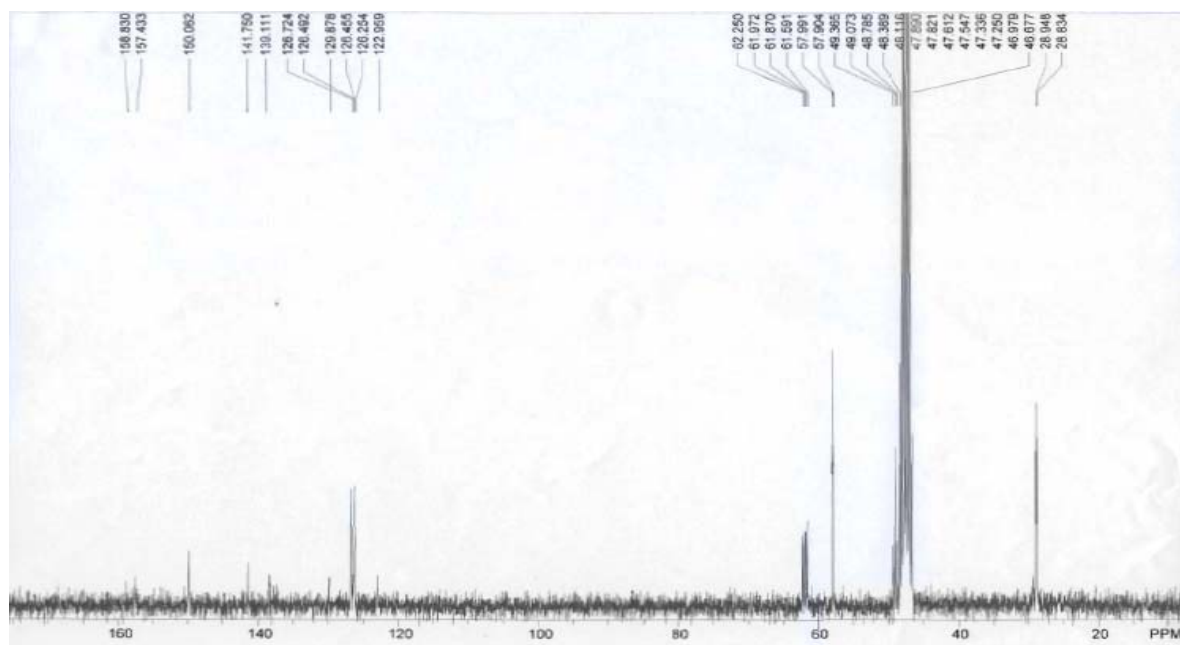

# Chiral HPLC analytical data of compound **21a**

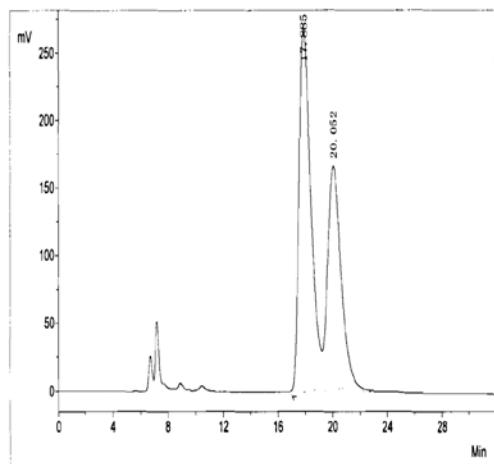

| 序号  | 峰号 | 组份名 | 保留时间   | 峰高       | 峰面积        | 面积百分比(%) |
|-----|----|-----|--------|----------|------------|----------|
| 1   | 1  |     | 17.885 | 268768.3 | 16268980.9 | 57.8470  |
| 2   | 2  |     | 20.052 | 166843.6 | 11855157.5 | 42.1530  |
| 合计: |    |     |        | 435611.9 | 28124138.4 | 100.0000 |

*authentic racemic*

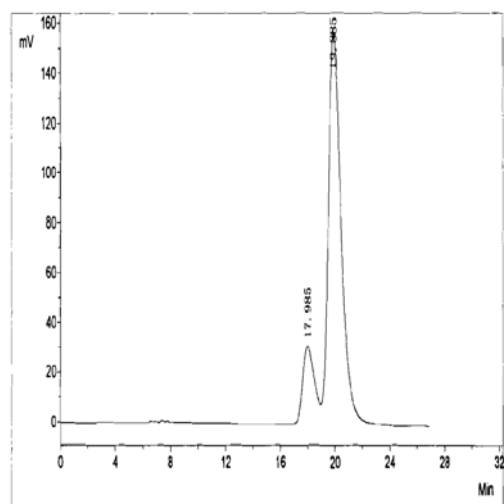

| 序号  | 峰号 | 组份名 | 保留时间   | 峰高       | 峰面积        | 面积百分比(%) |
|-----|----|-----|--------|----------|------------|----------|
| 1   | 1  |     | 17.985 | 31234.2  | 1874549.2  | 15.4644  |
| 2   | 2  |     | 19.885 | 156928.8 | 10247132.7 | 84.5356  |
| 合计: |    |     |        | 188163.0 | 12121681.9 | 100.0000 |

**21a** ee 70%

The chiral HPLC analytical data: Chiralpak OD column, detected at  $\lambda=214\text{nm}$ , eluent: *n*-hexane/*i*-PrOH (70:30), 0.4ml/min,  $t_R$  (21a) = 19.8 min,  $t_R$  (23a) = 17.8 min.

# Chiral HPLC analytical data of compound **21b** and **23b**

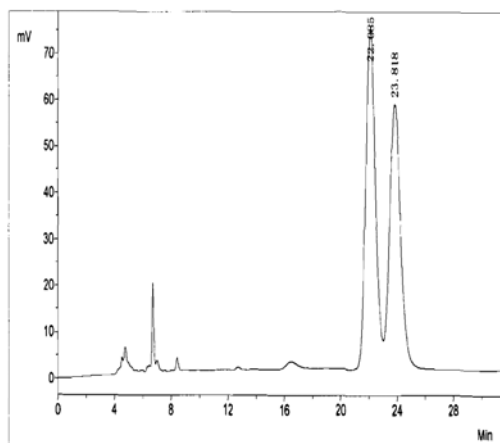

| 序号  | 峰号 | 组份名 | 保留时间   | 峰高       | 峰面积       | 面积百分比(%) |
|-----|----|-----|--------|----------|-----------|----------|
| 1   | 1  |     | 22.085 | 73075.4  | 3517359.5 | 53.0495  |
| 2   | 2  |     | 23.818 | 57120.9  | 3112980.4 | 46.9505  |
| 合计: |    |     |        | 130196.3 | 6630339.9 | 100.0000 |

*authentic racemic*

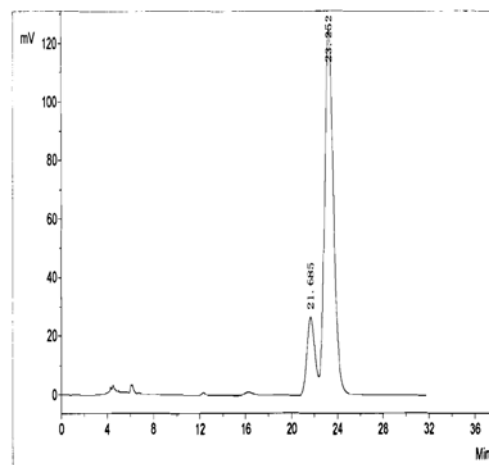

| 序号  | 峰号 | 组份名 | 保留时间   | 峰高       | 峰面积       | 面积百分比(%) |
|-----|----|-----|--------|----------|-----------|----------|
| 1   | 1  |     | 21.685 | 26477.6  | 1279096.9 | 15.9350  |
| 2   | 2  |     | 23.252 | 124681.1 | 6747869.2 | 84.0650  |
| 合计: |    |     |        | 151158.7 | 8026966.2 | 100.0000 |

**21b** ee 70%

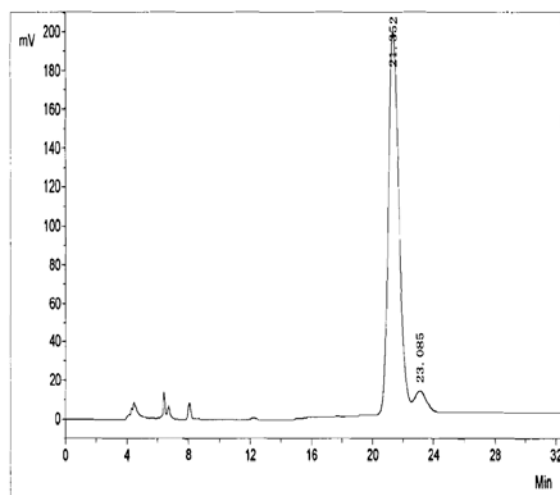

| 序号  | 峰号 | 组份名 | 保留时间   | 峰高       | 峰面积        | 面积百分比(%) |
|-----|----|-----|--------|----------|------------|----------|
| 1   | 1  |     | 21.352 | 197471.6 | 9569684.9  | 93.5022  |
| 2   | 2  |     | 23.085 | 11798.4  | 665032.7   | 6.4978   |
| 合计: |    |     |        | 209270.0 | 10234717.7 | 100.0000 |

**23b** ee 87%

The chiral HPLC analytical data: Chiralpak IC column, detected at  $\lambda=214\text{nm}$ , eluent: *n*-hexane/*i*-PrOH (70:30), 0.7ml/min,  $t_R$  (23b) = 21.3 min,  $t_R$  (21b) = 23.2 min
